1 **High-Intensity Interval Training Improves physical morphology, Cardiopulmonary Fitness**  
2 **and Metabolic Risk Indicators of Cardiovascular Disease in Children and Adolescents: A**  
3 **Systematic Review and Meta-Analysis**

4 Menjie<sup>1\*a</sup> Zou Shuangling<sup>1a</sup> Majia<sup>2a</sup> Xiang chenmin<sup>2a</sup> Li Shufeng<sup>2a</sup> Wang Junli<sup>2b</sup>

5 (a Fenyang College, Shanxi Medical University, Fenyang, Shanxi, 032200; b Xinjiang University, 830046)

6 **ABSTRACT**

7 *Objective* To systematically evaluate the safety and efficacy of high-intensity interval training in  
8 children and adolescents.

9 *Design* Systematic Review and Meta-Analysis

10 *Methods* Eight databases were searched. Descriptive analysis of the efficacy and safety of high-  
11 intensity interval training on body shape, cardiorespiratory fitness, and metabolic risk markers for  
12 cardiovascular disease between children and adolescents. Subgroup analysis was performed with age,  
13 participants, intervention time, and exercise frequency as covariates.

14 *Results* 47 studies included 2995 children and adolescents. Meta-analysis results showed that high-  
15 intensity interval training significantly improved cardiorespiratory fitness indicators ( $VO_{2max}$ , SBP, DBP  
16 and  $HR_{max}$ ) and cardiovascular disease metabolic risk indicators (TC, HDL-C). HIIT had no significant  
17 effect on body shape indicators (BMI, BF% and WC) and some cardiometabolic indicators (TG and  
18 LDL-C).

19 *Conclusion* Current evidence shows insufficient evidence that high-intensity interval training with  
20 intermittent running as the main form of exercise improves body shape indicators in children and

---

\* Corresponding author: Menjie, 1986, master, [menjie2020@126.com](mailto:menjie2020@126.com), research direction: sports medicine, exercise to promote health and health management.  
NOTE: This preprint reports new research that has not been certified by peer review and should not be used to guide clinical practice.

21 adolescents. Nevertheless, it deserves to recommend for the purpose of improving cardiorespiratory  
22 fitness and reducing the metabolic risk of cardiovascular disease.

23 **Keywords:** High-Intensity Interval Training, Children, Adolescents, Somatotype, Cardiopulmonary fitness,  
24 Cardiovascular disease.

## 25 INTRODUCTION

26 In 2018, the World Health Organization (WHO) conducted a summary analysis of 16 million children  
27 and adolescents in 146 countries and regions based on 298 population surveys and pointed out that 85% of  
28 girls and 78% of boys in the world did not meet the WHO recommended standards, which leads to the  
29 inevitable global trend towards the insufficient physical activity of adolescents [1]. There is growing evidence  
30 that physical inactivity in children and adolescents increases the prevalence of cardiovascular disease in  
31 adulthood and affects cognitive development, social interaction and even current and future health[2, 3].  
32 Insufficient physical activity between children and adolescents is highly correlated with metabolic diseases  
33 in adulthood, especially increasing the risk of diseases such as metabolic obesity, type 2 diabetes mellitus  
34 (T<sub>2</sub>DM), cardiovascular disease (CVD), and cancer[4]. To achieve the goal of reducing the insufficient rate  
35 of physical activity by 15% in 2030, it is necessary to enhance the level of physical activity of children and  
36 adolescents[5]. What we all know is that continuous aerobic exercise can increase the aerobic capacity of the  
37 body, improve the sensitivity of insulin resistance, improve the level of lipometabolism and reduce the risk of  
38 diseases caused by physical inactivity. However, aerobic exercise lasts for a long time and has a single rhythm,  
39 which makes it difficult for most people to persist. But one of the main obstacles to achieving regular physical  
40 activity for current children and adolescents is the lack of time. Therefore, it is likely to replace aerobic  
41 exercise with high-intensity interval training (HIIT), because HIIT has the advantages of low time cost, less  
42 exercise volume, easy persistence, and equivalent exercise effect to aerobic exercise. HIIT refers to the

43 training method that is repeated multiple times at a greater than or equal to anaerobic threshold or maximal  
44 lactate steady-state intensity with incomplete recovery between each set of exercises. The body is more  
45 sensitive to the stimulation of HIIT and produces more comprehensive benefits in terms of sports ability,  
46 skeletal muscle metabolism and energy consumption.

47 In recent years, the comparison between HIIT and continuous aerobic exercise effect value has become  
48 a hot research topic, and the research groups are mainly obese and athletes: Obese people focus on body  
49 composition, metabolism and cardiorespiratory fitness (CRF), while athletes are primarily concerned with  
50 athletic performance and physiological adaptation during exercise[6].

51 HIIT research on obese children and adolescents and normal children and adolescents has gradually  
52 attracted attention and achieved certain research results. A recently published meta-analysis of HIIT targeting  
53 obese children and adolescents showed that HIIT was effective in improving cardiometabolic level,  
54 cardiopulmonary adaptability, and aerobic capacity of obese children and adolescents, but the evidence for  
55 conclusions about body composition improvement is insufficient[7]. Meta-analysis of healthy children and  
56 adolescents has shown that HIIT can effectively improve the health level of children and adolescents and  
57 cardiovascular disease risk factors[8]. Meta-analysis of young athletes shows that HIIT can improve the  
58 aerobic and anaerobic exercise ability of young athletes, and the time cost is lower. Comparing HIIT with  
59 moderate-intensity continuous training (MICT) found similar effects on body composition, blood pressure in  
60 childhood obesity[9] and greater improvements in cardiorespiratory fitness in children and adolescents. HIIT  
61 can be used as an alternative training mode of MICT to maintain cardiometabolic health and it can be applied  
62 to the management of childhood obesity. Whereas, previous studies have small sample sizes, deviation of  
63 outcome index measurement tools, language bias[8], and unclear description of exercise dose[10], especially  
64 lack subgroup analyses on the influence of pre-puberty and pubertygender[7] that affect the stability of results.

65 Given the above, this study will systematically evaluate the effectiveness and safety of HIIT for children and  
66 adolescents, expecting to provide a scientific basis for the promotion of HIIT in children and adolescents.

## 67 **METHODS**

### 68 **Protocol**

69 A systematic review and meta-analyses were conducted in accordance with the 27 checklists applying  
70 the established guidelines of the PRISMA statement 2020[11], whose aim is to serve as a basis for reporting  
71 systematic reviews of randomized trials. Besides there is no registration review protocol for this study.

### 72 **Document retrieval strategy**

73 The computer retrieves PubMed, The Cochrane Library, Embase, Web of science, Science Direct, CNKI,  
74 WanFang and VIP databases. In addition, research published by Google Scholar was hand-searched.  
75 Randomized controlled and non-randomized controlled trials on the health efficacy and safety of HIIT  
76 between children and adolescents were collected. The retrieval time limit was from the establishment of the  
77 database to January 1, 2022. We employed the following MeSH terms: High-Intensity Interval Training,  
78 High-Intensity Interval, High-Intensity Intermittent, Adolescence, Teenagers, randomized controlled trial,  
79 RCT, etc. Taking PubMed as an example, the specific search strategy is shown in [Table 1](#).

### 80 **Inclusion and exclusion criteria**

81 Studies of children and adolescents were considered for the systematic review provided they met  
82 the following inclusion criteria:

- 83 ● Type of study: Randomized controlled trial (RCT) or controlled trial.
- 84 ● Participants: Children and adolescents aged 5 to 19 (Normal weight, obesity, disease, etc.).

85 ● Interventions: The control group received no intervention. The experimental group was high-intensity  
 86 interval training, and the interventions had no specific requirements except for intensity (intensity  
 87  $\geq 80\%HR_{max}$  or  $\geq 100\%$  aerobic speed or  $\geq 80\%VO_{2max}$ ).

88 ● Outcome indexes: body shape indicators, CRF indicators and cardiovascular disease metabolic risk  
 89 indicators.

90 Studies were excluded in the following cases:

- 91 ● Not reported in Chinese or English.
- 92 ● Controlled experiment before and after intervention.
- 93 ● Duplicate published literature.
- 94 ● Studies that could not extract important outcome data.

95 **Table 1** Full-search strategy for PubMed.

| Number | Search terms                                                                                                                                                                                                                              |
|--------|-------------------------------------------------------------------------------------------------------------------------------------------------------------------------------------------------------------------------------------------|
| #1     | Adolescent [MeSH Terms]                                                                                                                                                                                                                   |
| #2     | (((((Adolescence [Title/Abstract]) OR (Teens [Title/Abstract])) OR (Teenagers [Title/Abstract])) OR (Youths [Title/Abstract])) OR (Female Adolescents [Title/Abstract])) OR (Male Adolescents [Title/Abstract]))                          |
| #3     | #1 or #2                                                                                                                                                                                                                                  |
| #4     | High-Intensity Interval Training [MeSH Terms]                                                                                                                                                                                             |
| #5     | ((((High-Intensity Interval [Title/Abstract]) OR (High-Intensity Intermittent [Title/Abstract])) OR (High-Intensity Intermittent Exercises [Title/Abstract])) OR (Sprint Interval Trainings [Title/Abstract])) OR (HIIT[Title/Abstract])) |
| #6     | #4 or #5                                                                                                                                                                                                                                  |
| #7     | randomized controlled trial [MeSH Terms]                                                                                                                                                                                                  |
| #8     | ((RCT[Title/Abstract]) OR (Randomized [Title/Abstract])) OR (Randomized Clinical [Title/Abstract]) OR (Controlled Clinical Trials [Title/Abstract]))                                                                                      |
| #9     | #7 or #8                                                                                                                                                                                                                                  |
| #10    | #9 AND #6 AND #3                                                                                                                                                                                                                          |

96

## 97 **Literature screening and data extraction**

98 Two researchers (Zou Shuangling and Xiang Chenmin) independently screened the literature, extracted  
99 data and cross-checked. If there was any disagreement, it would be resolved through consultation. If additional  
100 information was required, contact the corresponding author by email. The extracted content includes:(i) the  
101 basic information of the included studies: research title, author, publication year, journal name, etc.; (ii)  
102 baseline characteristics and interventions of the study subjects; (iii) outcome index data and outcome index  
103 measurement methods. (iv) Whether lost to follow-up, withdrawal, medical supervision measures and  
104 description of adverse reaction events, etc.

## 105 **Risk of bias and evaluation of literature quality included in the study**

106 The bias risk assessment tools Cochrane (RoB2.0) and RevMan 5.3 independently evaluated the risk of  
107 bias in the included studies by two investigators (Menjie and Majia) and cross-checked the results.

## 108 **Statistical analysis**

109 Meta-analysis was performed using RevMan 5.3 and Stata 15.0 software. The measurement data used  
110 mean difference (MD) as the effect analysis statistics, and each effect amount provided its 95% confidence  
111 interval (CI). Sensitivity analysis of the included studies was performed to assess data robustness, and  
112 heterogeneity magnitude was evaluated in combination with  $I^2$ : when  $I^2 < 25\%$  is low heterogeneity,  $I^2 = 25\sim 50\%$   
113 is moderate heterogeneity,  $I^2 > 50\%$  is high heterogeneity, the level of meta-analysis is set to  $\alpha = 0.05$ . If the  
114 heterogeneity between the results was not statistically significant, a fixed-effects model was used for meta-  
115 analysis; if there was statistical heterogeneity between the studies, a random-effects model was used for meta-  
116 analysis and subgroup analysis was used to analyze the sources of heterogeneity further. Publication bias is  
117 graphically assessed by Egger's linear regression analysis.

## 118 **RESULTS**

## 119 **Literature screening process and results**

120 3,868 studies were retrieved in December 2021: 471 studies were deleted for duplication ,and after  
121 title and abstract screening, 3195 studies were considered ineligible and 202 full texts were screened  
122 based on inclusion/exclusion criteria. Finally a total of 47 studies were included, and the content of the  
123 literature selection process and results are shown in [Fig.1](#).

## 124 **Incorporate basic characteristics of research**

125 [Table 2](#) summarizes the basic characteristics of 47 studies[12-58], which investigated a total of 2995  
126 subjects (HIIT group: 1749, control group: 1246). Among them, there were 1165 boys (38.90%), 1156 girls  
127 (38.60%) and 696 girls (23.24%) who did not mention gender. There were 2328 children (77.73%) and 667  
128 adolescents (22.27%). 438 were overweight/obese (14.62%); 106 athletes (3.54%); 433 sick children and  
129 adolescents (14.46%); There were 26 studies with medical supervision description (55.32%), 0 studies without  
130 medical supervision and 21 studies without detailed description (44.68%).

## 131 **Study quality assessment (risk of bias) and sensitivity analysis**

132 A total of 47 studies were included in this meta-analysis, with reasonable overall risk bias and good  
133 quality papers ([Fig. 2](#)). Egger's examined BMI, BF%, WC, VO<sub>2max</sub>, SBP, DBP, and HR<sub>max</sub> and found  
134 that BF% was at risk of publication bias ( $p<0.05$ ) ([Table 3](#)). The sensitivity results showed that the  
135 overall data were stable ([Supplemental Fig. 1-11](#)).

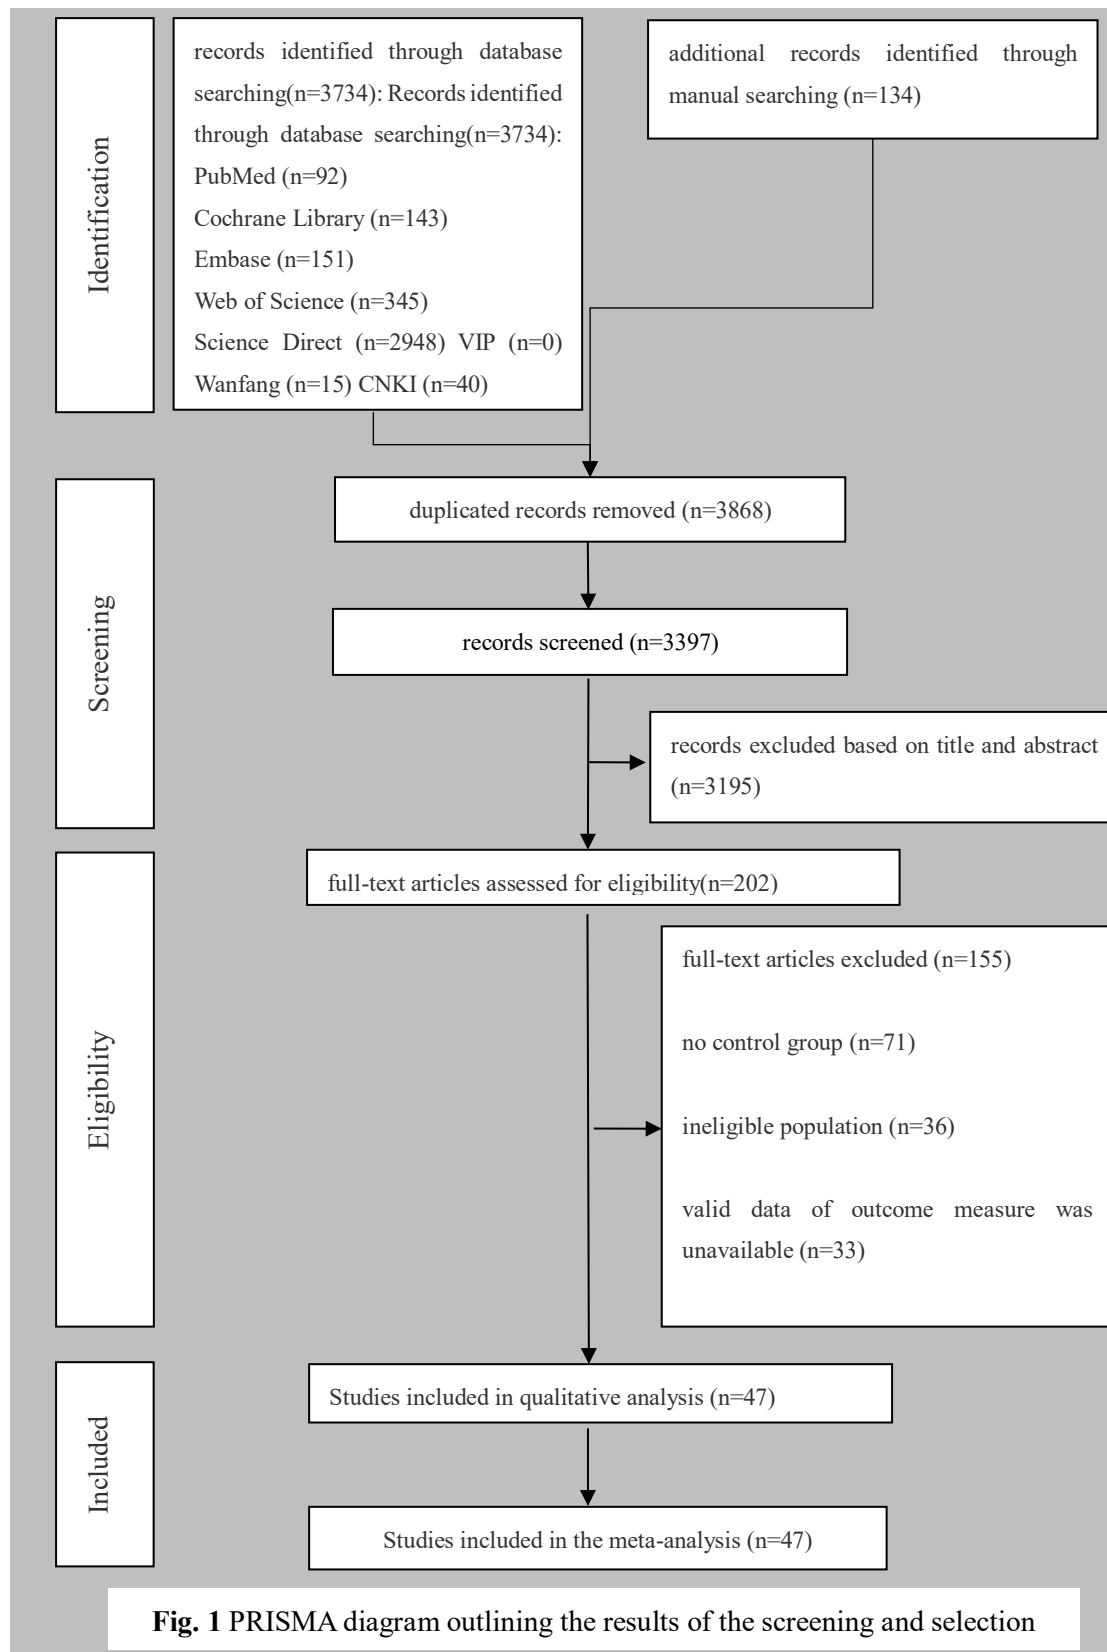



**Table 2** Basic features of the included studies

| Author               | Year | Country   | Lesion      | Age                                           |                                            | sample                                           |                                                  | Intervention measure                                                                                                                                                               |                                                                                             | Intervention time  |               | outcome indicator     |
|----------------------|------|-----------|-------------|-----------------------------------------------|--------------------------------------------|--------------------------------------------------|--------------------------------------------------|------------------------------------------------------------------------------------------------------------------------------------------------------------------------------------|---------------------------------------------------------------------------------------------|--------------------|---------------|-----------------------|
|                      |      |           |             | experimental group                            | control group                              | experimental group (male/female)                 | control group (male/female)                      | experimental group                                                                                                                                                                 | control group                                                                               | experimental group | control group |                       |
| Valérie et al.[12]   | 2022 | France    | Obesity     | 13.0 ± 1.1                                    | 13.2 ± 1.0                                 | 19(11/8)                                         | 11(6/5)                                          | mode of motion: ergometer bicycle<br>exercise time:15mins<br>exercise frequency: twice/week<br>exercise intensity:75% to 90% VO <sub>2</sub> max                                   | not any physical training                                                                   | 16 weeks           | 16 weeks      | ①,②                   |
| Engel et al[22].     | 2019 | Germany   | healthy     | 11.6 ± 0.2                                    | 11.7 ± 0.3                                 | 17 (11/6)                                        | 18(11/7)                                         | mode of motion: micro-session of Functional HIIT<br>exercise time:>6 mins<br>exercise frequency: week 1:3 times; week 2 to 4:4 times<br>exercise intensity: >85% HR <sub>max</sub> | mode of motion: regular school class                                                        | 4 weeks            | 4 weeks       | ①                     |
| Georges et al.[51]   | 2010 | France    | healthy     | 10.3± 9.8                                     | 10.1 ± 1.2                                 | 22                                               | 19                                               | mode of motion: interval run<br>exercise time:18 to 39 minutes<br>exercise frequency:3 additional PE and 2 regular mandatory PE<br>exercise intensity:80 to 85% of MAS             | mode of motion: regular mandatory PE<br>exercise time:60 mins<br>exercise frequency: 2/week | 7 weeks            | 7 weeks       | ①,⑧, ⑪                |
| MCNARRY et al.[15]   | 2020 | England   | asthma      | Asthma:<br>14.1±0.9<br>No-asthma:<br>14.1±0.8 | Asthma :14.2±1.0<br>No-asthma:<br>13.9±0.9 | Asthma group:<br>18 (10/8)<br>No-asthma:17 (9/8) | Asthma group:<br>18 (11/7)<br>No-asthma:16 (9/7) | mode of motion: games-based activities informed by formative work<br>exercise time:30 mins<br>exercise frequency:3/week<br>exercise intensity: >90%HR <sub>max</sub>               | exercise time:30 mins                                                                       | 6 mouths           | 6 mouths      | ①,⑧                   |
| Mazurek et al.[42]   | 2014 | Poland    | females     | 19.5±0.6                                      |                                            | 24                                               | 42                                               | mode of motion: Mechanically-braked cycle ergometers<br>exercise time:47 mins<br>exercise frequency:3/week<br>exercise intensity:60% HR <sub>max</sub>                             | mode of motion: regular PE<br>exercise time:47 mins<br>exercise frequency: 1/week           | 8 weeks            | 8 weeks       | ①,③,④,⑤,⑥,⑦,⑧         |
| Plavsic et al.[16]   | 2020 | Serbia    | Obesity     | 16.6 ± 1.3                                    | 15.8 ± 1.5                                 | 22                                               | 22                                               | mode of motion: Diet + HIIT (electronically braked cycle ergometer)<br>exercise time:43mins<br>exercise frequency:2/week<br>exercise intensity:85 to 90% of HR <sub>max</sub>      | mode of motion: Diet                                                                        | 12 weeks           | 12 weeks      | ①,②,③,④,⑤,⑥,⑦,⑧,⑨,⑩,⑪ |
| Cvetković et al.[29] | 2018 | Serbia.   | obese males |                                               |                                            | 10                                               | 11                                               | mode of motion: PE+HIIT (interval runs)<br>exercise frequency:2/week                                                                                                               | mode of motion: PE<br>exercise frequency: 2/week                                            | 12weeks            | 12weeks       | ①,②,⑨,⑩,⑪             |
| Leahy et al.[23]     | 2019 | Australia | healthy     | 16.2±0.4                                      | 16.2±0.4                                   | 38                                               | 30                                               | mode of motion: included a combination of aerobic-based and resistance-based<br>exercise time:12–20 min<br>exercise frequency:3/week<br>exercise intensity:>85% HR <sub>max</sub>  |                                                                                             | 14 weeks           | 14 weeks      | ①,⑧                   |

|                               |      |           |                   |                                                 |                                                |                                      |                                     |                                                                                                                                                                 |                                                                         |           |           |                 |
|-------------------------------|------|-----------|-------------------|-------------------------------------------------|------------------------------------------------|--------------------------------------|-------------------------------------|-----------------------------------------------------------------------------------------------------------------------------------------------------------------|-------------------------------------------------------------------------|-----------|-----------|-----------------|
| Costigan et al.[34]           | 2016 | UK        | healthy           | 15.7±0.7                                        | 15.6±0.6                                       | 21                                   | 22 (11/11)                          | mode of motion: gross motor cardiorespiratory exercises<br>exercise time:8-10mins<br>exercise frequency:3/week                                                  | mode of motion: PE<br>exercise frequency:3/week                         | 8 weeks   | 8 weeks   | ①               |
| Rosenkranz et al.[48]         | 2012 | Manhattan | healthy           | 8.8±0.6                                         | 9.8±4.1                                        | 8                                    | 8                                   | mode of motion: performed on an indoor track<br>exercise time:30mins<br>exercise frequency: sessions spaced at least 48 h<br>exercise intensity:100–130% of MAS |                                                                         | 8 weeks   | 8 weeks   | ①,③,④,⑤,⑥,⑦,⑨,⑩ |
| Hammami et al.[30]            | 2018 | Tunisia   | soccer players    | 15.9 ± 0.4                                      | 15.8 ± 0.7                                     | 10                                   | 10                                  | mode of motion: small-sided soccer drills<br>exercise time:35-45mins<br>exercise frequency:2/week<br>exercise intensity: ~ 85% HR <sub>max</sub>                | mode of motion: regular physical activity<br>exercise frequency: 2/week | 8 weeks   | 8 weeks   | ①,②             |
| Winn et al.[13]               | 2021 | UK        | Asthma            | Asthma:<br>13.7 ± 1.0<br>No-asthma:<br>13.8±1.1 | Asthma:<br>13.4±1.2<br>No-asthma:<br>:13.5±1.0 | 221(116/105)                         | 69(21/48)                           | mode of motion: game-based activities<br>exercise frequency:3/week<br>exercise time:30mins<br>exercise intensity: >90% HR <sub>max</sub>                        | mode of motion:<br>incremental ramp test                                | 6 months  | 6 months  | ①               |
| Malte Nejst Larsen et al.[17] | 2020 | Denmark   | healthy           | 10±0.3                                          | 10±0.3                                         | 57                                   | 115                                 | exercise time:12 mins<br>exercise frequency:5/week                                                                                                              | mode of motion: PE lessons                                              | 10 months | 10 months | ⑨,⑩             |
| Soori et al.[18]              | 2020 | Iran      | hyperactivity     | 12.55 ± 0.15                                    | 12.5 ± 0.45                                    | 26 (9/17)                            | 17 (11/6)                           | mode of motion:20 meters running program<br>exercise time:>10 mins<br>exercise frequency:3/week<br>exercise intensity: 85% HR <sub>max</sub>                    |                                                                         | 6 weeks   | 6 weeks   | ⑪               |
| Racil et al.[45]              | 2013 | Tunisian  | obese             | 15.6 ± 0.7                                      | 15.9 ± 1.2                                     | 11                                   | 12                                  | mode of motion: short bursts<br>exercise frequency:3/week<br>exercise intensity:100 to 110 % of MAS                                                             | non-exercising                                                          | 12weeks   | 12 weeks  | ②,③,④,⑤,⑥,⑦,⑧   |
| Lambrick et al.[35]           | 2016 | UK        | Healthy and obese | obesity:93±0.8<br>normal:92±0.7                 | obesity:94±0.8<br>normal:9.2±0.8               | normal:13 (8/5)<br>obesity:15 (10/5) | normal:13 (7/6)<br>obesity:14 (7/7) | mode of motion: equipment<br>exercise time:40 min<br>exercise frequency:2/week<br>exercise intensity: 40% difference between GET and VO <sub>2max</sub>         | mode of motion: PE                                                      | 8 weeks   | 8 weeks   | ①,②,③,⑧,⑪       |
| Baquet et al.[57]             | 2001 | France    | health            | 12.8 ± 1.2                                      | 13.5 ± 0.9                                     | 503(263/240)                         | 48(21/27)                           | mode of motion: PE+ running exercises.<br>exercise time:3 h<br>exercise frequency:3/week<br>exercise intensity:100 to 120% MAS                                  | mode of motion: PE<br>exercise time:3 h<br>frequency:3/week             | 10 weeks  | 10 weeks  | ①,②             |
| Tjønnå et al.[54]             | 2009 | Norway    | Obese             | 14.0 ±0.3 years                                 |                                                | 13                                   | 14                                  | mode of motion: walking/running<br>exercise time: 40min<br>exercise frequency: 2/week<br>exercise intensity:90% HR <sub>max</sub>                               | mode of motion: exercise<br>exercise frequency: 2/month                 | 3 months  | 12 months | ①,②,③,⑧,⑨,⑩     |

|                         |      |             |                                  |                                   |                                   |            |              |                                                                                                                                                    |                                                  |          |          |                   |      |
|-------------------------|------|-------------|----------------------------------|-----------------------------------|-----------------------------------|------------|--------------|----------------------------------------------------------------------------------------------------------------------------------------------------|--------------------------------------------------|----------|----------|-------------------|------|
| Zhu Kunru[19]           | 2020 | China       | Healthy girl                     | 16.35±0.490                       | 17.20±0.410                       | 20 (0/20)  | 20 (0/20)    | mode of motion: rope skipping<br>exercise time:15-20mins<br>exercise frequency:3/week                                                              | Regular training 15-20mins                       | 12 weeks | 12 weeks | ①                 |      |
| Li kang[31]             | 2018 | China       | Healthy girl                     | 16.34±0.91                        | 16.63±0.90                        | 38 (0/38)  | 54 (0/54)    | mode of motion: sprints<br>exercise time:4-9mins (Stepwise increase)<br>exercise frequency:2/week                                                  | Regular PE                                       | 8 weeks  | 8 weeks  | ①,⑧               |      |
| Mu Taiyang[24]          | 2019 | China       | Overweight and obese male judoka | 17.00±0.89                        | 17.18±0.98                        | 11 (11/0)  | 11 (11/0)    | mode of motion: Running and judo training<br>exercise time:45mins<br>exercise frequency:3/week<br>exercise intensity: >85% HR <sub>max</sub>       | Regular training 45mins                          | 12 weeks | 12 weeks | ①,②,③             |      |
| Yang Zhongwu[25]        | 2019 | China       | teenagers                        | 11.50±0.513                       | 11.50±0.513                       | 20 (10/10) | 20 (10/10)   | exercise time:45mins<br>exercise frequency:2/week<br>exercise intensity:85% to 90% HR <sub>max</sub>                                               | 60% to 70% HR <sub>max</sub>                     | 8 weeks  | 8 weeks  | ①,③               |      |
| Huo Kaiwen[20]          | 2020 | China       | teenagers                        | boy:12.70±0.48<br>girl:12.50±0.53 | boy:12.80±0.42<br>girl:12.90±0.32 | 20         | 20           | exercise time:50-60mins<br>exercise frequency:2/week<br>exercise intensity:90% to 95% HR <sub>max</sub>                                            | Regular training 50 to 60mins                    | 8 weeks  | 8 weeks  | ①,⑧               |      |
| Ma Qin[21]              | 2020 | China       | Obese male adolescents           | 13.53±0.72                        | 13.90±0.89                        | 15 (15/0)  | 15 (15/0)    | mode of motion: Combination of training<br>exercise time:40-50mins<br>exercise frequency:2/week<br>exercise intensity:85% HR <sub>max</sub>        | Regular PE                                       | 8 weeks  | 8 weeks  | ①,②               |      |
| Dai Xiangdi[14]         | 2021 | China       | Healthy teenagers                | About 14                          | About 14                          | 49         | 47           | mode of motion: Combination of training<br>exercise time:20mins<br>exercise frequency:2/week<br>exercise intensity:65% to 85% HR <sub>max</sub>    | Regular PE                                       | 8 weeks  | 8 weeks  | ①                 |      |
| Cao et al.[49]          | 2012 | China       | Obese adolescent boys            | 13-15                             | 13-15                             | 20 (20/0)  | 20 (20/0) J2 | mode of motion: Combination of training<br>exercise time:50-60mins<br>exercise frequency:2/week<br>exercise intensity:90% to 95% HR <sub>max</sub> | Daily habits                                     | 8 weeks  | 8 weeks  | ①,②,⑧,⑨,⑩         |      |
| Martin Smith et al.[26] | 2019 | Scottish    | from 2 higher PE class           | 17±0.3                            | 16.8±0.5                          | 22(13/9)   | 30 (19/11)   | mode of motion: running sprints<br>exercise time:25-26mins<br>exercise frequency:3/week<br>exercise intensity:92% of HR <sub>max</sub>             | mode of motion: PE<br>exercise time:1 h          | 4 weeks  | 4weeks   | ①,③,④,⑤,⑥,⑦,⑧,⑨,⑩ |      |
| Ludyga et al.[27]       | 2019 | Switzerland | healthy male adolescents         | 14±0.8                            | 13.9±0.6                          | 32         | 28           | mode of motion: a circuit training<br>exercise time:20 mins                                                                                        |                                                  |          |          |                   | ①, ⑪ |
| Ruiz-Ariza et al.[28]   | 2019 | Spain       | healthy                          | 13.79 ± 1.38                      | 13.67 ± 1.29                      | 90(46/44)  | 94(52/42)    | mode of motion: Combination of training<br>exercise time:16mins<br>exercise frequency:2/week<br>exercise intensity: over 85% HR <sub>max</sub>     | mode of motion: PE<br>exercise frequency: 2/week | 12 weeks | 12 weeks | ①                 |      |
| Racil et al. [36]       | 2016 | Tunis       | obese adolescent females         | 14.2±1.2 years                    |                                   | 17         | 14           | mode of motion: Combined interval running<br>exercise time:>35mins<br>exercise frequency:3/week<br>exercise intensity:100% MAS                     | mode of motion: non-exercising group             | 12 weeks | 12 weeks | ②,③,⑨,⑩,⑪         |      |

|                              |      |                          |                                    |                                               |                                               |                         |                         |                                                                                                                                                                                                                                                                                                           |                                                                                                                             |          |          |                     |
|------------------------------|------|--------------------------|------------------------------------|-----------------------------------------------|-----------------------------------------------|-------------------------|-------------------------|-----------------------------------------------------------------------------------------------------------------------------------------------------------------------------------------------------------------------------------------------------------------------------------------------------------|-----------------------------------------------------------------------------------------------------------------------------|----------|----------|---------------------|
| Weston et al.[37]            | 2016 | United Kingdom           | Healthy and obese                  | 14.1 ± 0.3                                    | 14.1 ± 0.3                                    | 41 (33/8)               | 60(30/30)               | mode of motion: Many kinds of sports<br>exercise frequency:3/week<br>exercise intensity:90% HR <sub>max</sub>                                                                                                                                                                                             | mode of motion: PE<br>exercise frequency:<br>3/week                                                                         | 10 weeks | 10 weeks | ①,②,③,⑨,<br>⑩       |
| Racil et al.[38]             | 2016 | Tunisia                  | obese female adolescents           | 16.6 ± 0.9                                    | 16.9 ± 1.0                                    | 23                      | 19                      | mode of motion: plyometric exercises<br>exercise time: 26 to28mins<br>exercise frequency:3/week<br>exercise intensity:100%VO <sub>2 max</sub>                                                                                                                                                             | no exercise                                                                                                                 | 12 weeks | 12 weeks | ②,③,⑧               |
| McNarry et al.[39]           | 2015 | UK                       | health and obesity                 | Obesity:<br>9.3 ± 0.9<br>normal:<br>9.2 ± 0.8 | Obesity:<br>9.3 ± 0.9<br>normal:<br>9.2 ± 0.8 | normal:13<br>obesity:15 | normal:16<br>obesity:11 | mode of motion: physical activity<br>exercise time:10 mins<br>exercise frequency:2/week                                                                                                                                                                                                                   | usual care control group                                                                                                    | 6 weeks  | 6 weeks  | ①,⑧, ⑪              |
| Martin et al.[40]            | 2015 | UK                       | healthy                            | 16.9 ± 0.3                                    | 16.8 ± 0.6                                    | 20(13 / 7)              | 23(18/5)                | mode of motion: Sprint combination training<br>exercise time:60 mins<br>exercise frequency:3/week                                                                                                                                                                                                         | mode of motion: PE<br>exercise frequency:<br>3/week                                                                         | 7 weeks  | 7 weeks  | ①                   |
| Peter Riis Hansen et al.[46] | 2013 | Porto district, Portugal | Overweight children                | 8—12                                          | 8—12                                          | 20 (17/3)               | 11 (7/4)                | mode of motion: technical football exercises and small-sided football games<br>exercise time:1h-1.5h<br>exercise frequency:4/week<br>exercise intensity: > 80% HR <sub>max</sub>                                                                                                                          | mode of motion:<br>compulsory sport curriculum at school<br>exercise frequency:<br>2/week<br>exercise time:45 to 90min/time | 3mouths  | 3mouths  | ①,⑨,⑩, ⑪            |
| Patrick Mucci et al.[47]     | 2013 | Tanner                   | prepubescent children              | 10.3±0.7                                      | 9.8±0.6                                       | 9 (4/5)                 | 9 (6/3)                 | mode of motion: running<br>exercise time:30mins<br>exercise frequency:2/week<br>exercise intensity:100%-130%                                                                                                                                                                                              | usual physical activities                                                                                                   | 8 weeks  | 8 weeks  | ⑧                   |
| Buchan et al.[50]            | 2012 | West of Scotland         | adolescent youth                   | 16.7±0.1                                      | 16.3±0.5                                      | 17 (15/2)               | 24 (20/4)               | mode of motion: repetitions of maximal sprint running<br>exercise time:54mins<br>exercise frequency:3/week<br>exercise intensity: maximal sprint running                                                                                                                                                  | maintain normal activity patterns                                                                                           | 7weeks   | 7weeks   | ①,②,④,⑤,<br>⑥,⑦,⑨,⑩ |
| Breil et al.[52]             | 2010 | Bern, Switzerland        | Healthy elite junior alpine skiers | 17.4±1.1                                      | 16.6±1.1                                      | 13                      | 8                       | mode of motion: cycle ergometer; ski-specific obstacle running course containing slalom, balancing and jumping elements<br>exercise frequency: 15 times training<br>exercise time:16mins<br>exercise intensity:90–95% HR <sub>max</sub>                                                                   | continued their normal endurance and strength training                                                                      | 11days   | 11days   | ①,②,③,⑩             |
| Ferrete et al.[44]           | 2014 | Spain                    | Healthy young soccer players       | 9.32±0.25                                     | 8.26±0.33                                     | 11                      | 13                      | mode of motion: underwent soccer training; 1/4 squat, deep jumps, CMJ with weight, and sprint exercises<br>exercise intensity: maximal voluntary intensity using player's body weight (or body weight plus light resistances) as external resistance<br>exercise time:30mins<br>exercise frequency:3/week | mode of motion:<br>underwent soccer training<br>exercise time:30mins<br>exercise frequency:3/week                           | 26weeks  | 26weeks  | ②                   |

|                              |      |              |                                                           |             |             |           |           |                                                                                                                                                            |                                                                                            |          |         |               |
|------------------------------|------|--------------|-----------------------------------------------------------|-------------|-------------|-----------|-----------|------------------------------------------------------------------------------------------------------------------------------------------------------------|--------------------------------------------------------------------------------------------|----------|---------|---------------|
| Lau et al.[41]               | 2015 | Hong Kong    | overweight children                                       | 11.0 ± 0.6  | 10.6 ± 0.6  | 15        | 12        | mode of motion: intermittent running; attended normal PE<br>exercise time:72mins<br>exercise frequency:3/week<br>exercise intensity:120% of MAS            | mode of motion:<br>attended normal PE<br>exercise time:35mins<br>exercise frequency:2/week | 6weeks   | 6weeks  | ①, ⑪          |
| Boer et al.[43]              | 2014 | Belgian      | adolescents and young adults with intellectual disability | 18±3.2      | 17.4±2.4    | 17 (11/6) | 14 (9/5)  | mode of motion: cycling<br>exercise time:40mins<br>exercise frequency:2/week<br>exercise intensity: >100%VTR                                               | participated in usual everyday scholar activities without supervised exercise training     | 15 weeks | 15weeks | ①,②,③,④,⑤,⑨,⑩ |
| A. M. McManus et al.[55]     | 2005 | Hong Kong    | boys                                                      | 10.35±0.32  | 10.51 ± 0.3 | 10        | 15        | mode of motion: Loop pedalling<br>exercise time:20mins<br>exercise frequency:3time/week                                                                    | normal physical activity                                                                   | 8weeks   | 8weeks  | ⑧,⑪           |
| Helgerud et al.[58]          | 2001 | America      | male                                                      | 18.1±0.8    | 18.1±0.8    | 9         | 10        | mode of motion: run + game<br>exercise frequency:2/week<br>exercise intensity: 90 to 95% of HR <sub>max</sub>                                              | Regular exercise                                                                           | 8weeks   | 8weeks  | ⑧             |
| G. Baquet et al.[56]         | 2002 | France       | pubescent children                                        | 9.7±0.9     | 10.1±0.4    | 20(10/10) | 33(13/20) | mode of motion: high intensity intermittent running exercises<br>exercise time:30mins<br>exercise frequency:2/week<br>exercise intensity:100 to130% of MAS | Normal PE                                                                                  | 7weeks   | 7weeks  | ②,⑧,⑪         |
| Anneke van Biljon et al.[32] | 2018 | The Republic | children                                                  | 11.1 ± 0.8  | 11.1 ± 0.8  | 29        | 24        | mode of motion: Sprint cycle<br>exercise time:23mins<br>exercise frequency:3/week<br>exercise intensity: > 80% HR <sub>max</sub>                           | Normal PE                                                                                  | 5weeks   | 5weeks  | ①,③,⑧,⑨,⑩     |
| Juliana Pizzi et al.[33]     | 2017 | America      | Obese Adolescences                                        | 12.18 ± 1.5 | 14.29 ± 1.8 | 20        | 34        | mode of motion: running<br>exercise time:45mins<br>exercise frequency:3/two days                                                                           |                                                                                            | 12weeks  | 12weeks | ①,③,④,⑤,⑥,⑦   |
| Lynne Mary Boddy et al.[53]  | 2010 | UK           | Obese                                                     | 11.78 ± 0.2 | 11.87 ± 0.3 | 8         | 8         | mode of motion: high intensity exercise program loosely based on dance<br>exercise time:20mins<br>exercise frequency:4/week                                | Normal life                                                                                | 3weeks   | 3weeks  | ①,②,③,⑧,⑨,⑩   |

138 Notes: ①BMI,②BF%,③WC,④TC,⑤TG,⑥HDL-C,⑦LDL-C,⑧VO<sub>2</sub>,⑨SBP,⑩DBP, ⑪HR<sub>max</sub>

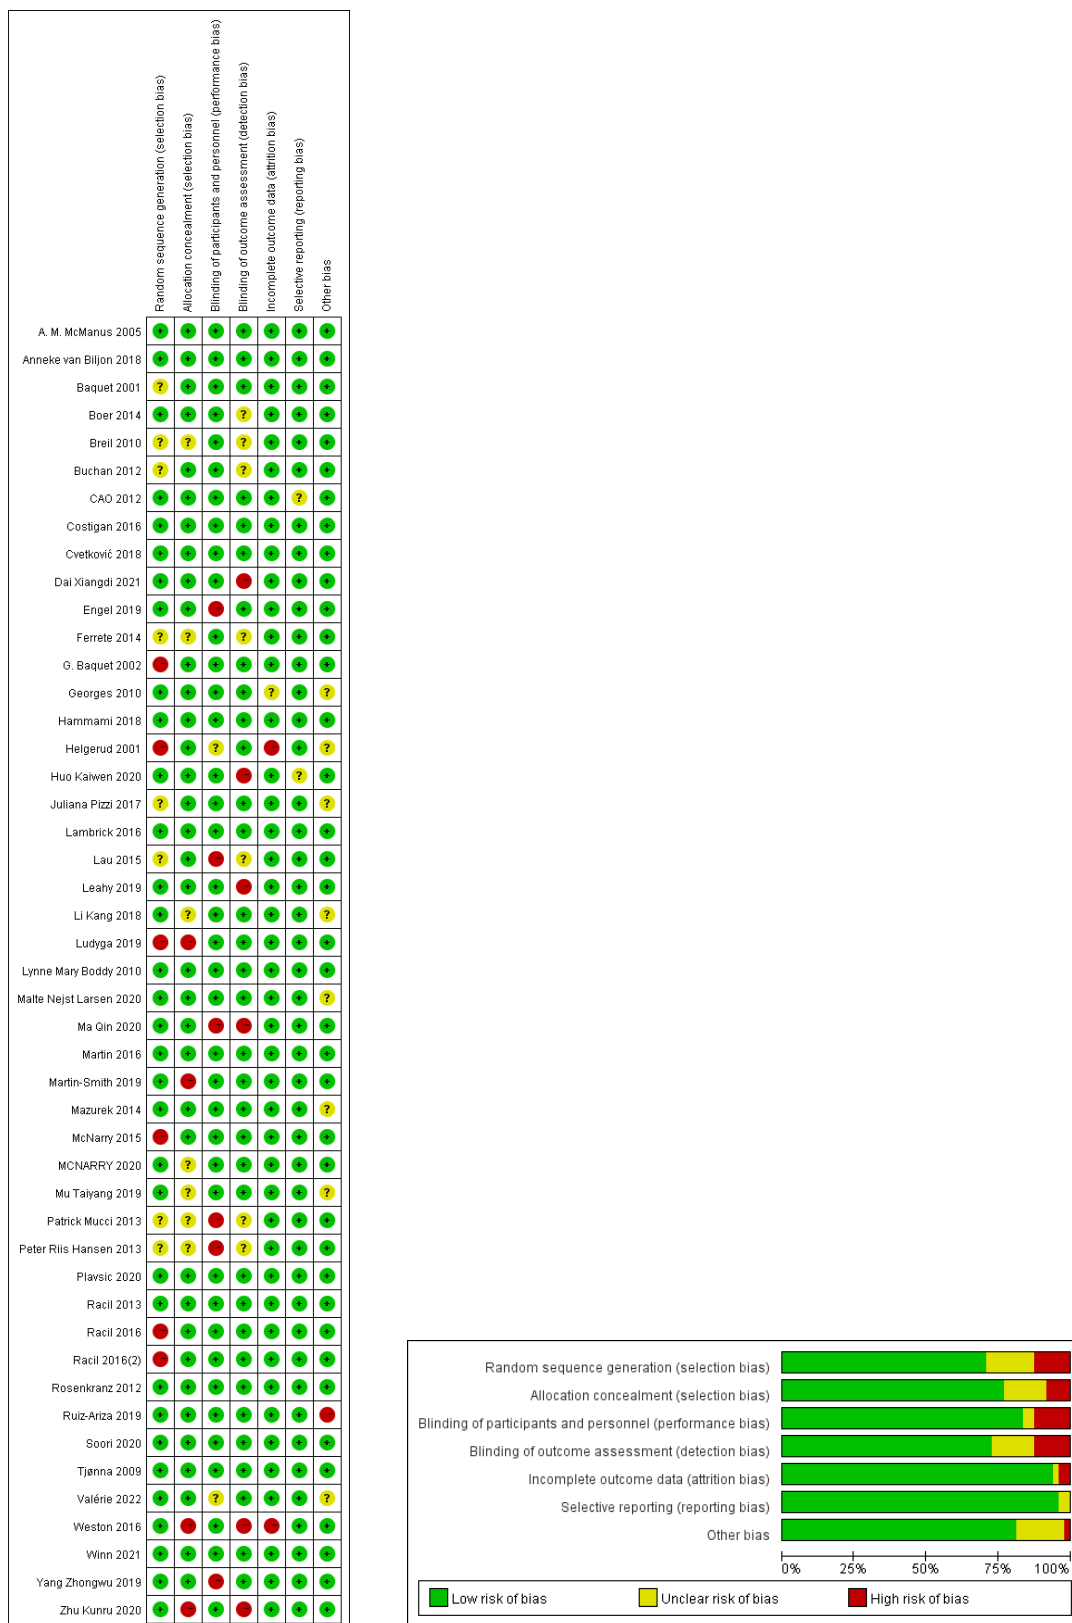

**Fig. 2** Analysis of the risk of bias according to the Cochrane Collaboration Guideline

**Table 2** Three-line table of Egger's Publishing Bias

| <b>Outcomes</b>    | <b>Number of studies</b> | <b>Root MSE</b> | <b>Std. Eff.</b> | <b>Coef.</b> | <b>Std. Err.</b> | <b>t</b> | <b>p&gt; t </b> | <b>[95% Conf. Interval]</b> |           |
|--------------------|--------------------------|-----------------|------------------|--------------|------------------|----------|-----------------|-----------------------------|-----------|
| BMI                | 36                       | 1.524           | slope            | .2195473     | .2006643         | 1.09     | 0.282           | -.1882517                   | .6273462  |
|                    |                          |                 | bias             | -1.013953    | .7345551         | -1.38    | 0.176           | -2.506749                   | .4788423  |
| BF%                | 20                       | 1.605           | slope            | -.6003318    | .3335849         | 1.80     | 0.089           | -.100504                    | 1.301168  |
|                    |                          |                 | bias             | -2.485502    | 1.056721         | -2.35    | 0.030           | -4.70559                    | -.2654136 |
| WC                 | 16                       | 1.673           | slope            | .7849622     | .5614075         | 1.40     | 0.184           | -.4191371                   | 1.9890611 |
|                    |                          |                 | bias             | -3.023636    | 1.763666         | -1.71    | 0.108           | -6.806323                   | .7590503  |
| VO <sub>2max</sub> | 19                       | 1.644           | slope            | -.3187151    | .4612036         | -0.69    | 0.499           | -1.29177                    | .6543394  |
|                    |                          |                 | bias             | 2.870097     | 1.416205         | 2.03     | 0.059           | -.1178346                   | 5.858029  |
| SBP                | 14                       | 1.446           | slope            | .078006      | .3490282         | 0.22     | 0.827           | -.6824612                   | .8384732  |
|                    |                          |                 | bias             | -1.319617    | 1.166486         | -1.13    | 0.280           | -3.861171                   | 1.221937  |
| DBP                | 14                       | 1.8             | slope            | .0417849     | .4332558         | 0.10     | 0.925           | -.9021983                   | .9857682  |
|                    |                          |                 | bias             | -.3722117    | 1.448374         | -0.26    | 0.802           | -3.527947                   | 2.783524  |
| HR <sub>max</sub>  | 13                       | 2.569           | slope            | -1.718386    | 1.203516         | -1.43    | 0.181           | -4.367307                   | .9305347  |
|                    |                          |                 | bias             | 5.734588     | 3.564588         | 1.61     | 0.136           | -2.111017                   | 13.58019  |

## 143 **Subgroup analysis**

144 Substantial sources of heterogeneity can be explored through subgroup analyses. Due to  
145 differences in the age, participants, intervention time, and exercise frequency of HIIT intervention in  
146 children and adolescents included in the study, HIIT's assessment of body morphology, CRF and  
147 cardiovascular disease metabolic risk indicators may be affected. Therefore, subgroup analyses have  
148 performed that were based on the age (5~15 years old,  $\geq 15$  years old), participants (health, obesity,  
149 Else whose participants are not specified, not limited to healthy, obese people, etc.), intervention time  
150 ( $\leq 10$  weeks,  $> 10$  weeks) and exercise frequency ( $\geq 3$  times/week,  $< 3$  times/week), it was shown in  
151 [Table 4](#).

## 152 **Meta-analysis results**

### 153 **Indicators of body morphology**

154 In 42 studies, HIIT (n=1638) did not improve body morphology compared to the control group  
155 (n=1080).

156 In 37 studies, the HIIT group (n=1518) had no significant effect on BMI [MD=-0.30, 95% CI (-  
157 0.72,0.13), p=0.17] compared with the control group (n=954). In 20 studies, the HIIT group (n=829)  
158 had no significant effect on BF% [MD=-0.79,95% CI (-1.64,0.06), p=0.07] compared with the control  
159 group (n=394). In 16 studies, the HIIT group (n=314) had no significant effect on WC [MD=-1.24, 95%  
160 CI (-2.78,0.30) compared with the control group (n=359) ([Fig. 3](#)).

### 161 **CRF Indicators**

162 In 32 studies, HIIT (n=702) effectively improved CRF indices compared with control groups  
163 (n=791), but clinical heterogeneity was high, so a subgroup analysis of CRF indexes was conducted  
164 ([Fig. 4](#)).



**Table 3** Three-line table of subgroup analysis

| Outcomes           | Subgroup              |               | The Number<br>of studies | Pooled estimate<br>[SMD/MD (95 %CI)] | p value | I <sup>2</sup> (%) | Test for subgroup<br>differences |
|--------------------|-----------------------|---------------|--------------------------|--------------------------------------|---------|--------------------|----------------------------------|
| BF(%)              | Participants          | Health        | 4                        | 1.23(-0.96,3.42)                     | p=0.270 | 42.0%              | p=0.020                          |
|                    |                       | Obesity       | 11                       | -1.59(-2.59, -0.58)                  | p=0.002 | 77.0%              |                                  |
|                    |                       | Else          | 5                        | 0.12(-1.11,1.35)                     | p=0.850 | 0.0%               |                                  |
| WC(cm)             | Participants          | Health        | 2                        | 0.57(-3.54,4.67)                     | p=0.790 | 0.0%               | p=0.350                          |
|                    |                       | Obesity       | 8                        | -2.06(-3.26, -0.86)                  | p<0.001 | 0.0%               |                                  |
|                    |                       | Else          | 6                        | -0.36(-3.82,3.09)                    | p=0.840 | 83.0%              |                                  |
| VO <sub>2max</sub> | Age                   | 5<<15         | 10                       | 3.99(2.76,5.22)                      | p<0.001 | 44.0%              | p=0.130                          |
|                    |                       | ≥15           | 9                        | 1.76(0.75,2.76)                      | p=0.090 | 91.0%              |                                  |
|                    | Participants          | Health        | 5                        | 3.49(1.57,5.41)                      | p<0.001 | 42.0%              | p<0.001                          |
|                    |                       | Obesity       | 6                        | 2.12(0.05,4.18)                      | p=0.040 | 92.0%              |                                  |
|                    |                       | Else          | 8                        | 3.31(1.93,4.69)                      | p<0.001 | 0.0%               |                                  |
|                    | Intervention<br>Time  | ≤10 weeks     | 14                       | 3.59(2.38,4.81)                      | p<0.001 | 44.0%              | p=0.130                          |
|                    |                       | >10 weeks     | 5                        | 1.77(-0.26,3.79)                     | p=0.090 | 91.0%              |                                  |
|                    | Exercise<br>Frequency | <3 times/week | 9                        | 3.09(1.80,4.38)                      | p<0.001 | 65.0%              | p=0.750                          |
|                    |                       | ≥3 times/week | 10                       | 2.76(1.21,4.31)                      | p<0.001 | 67.0%              |                                  |
| SBP                | Age                   | 5<<15         | 10                       | -2.00(-4.22,0.21)                    | p=0.008 | 69.0%              | p=0.100                          |
|                    |                       | ≥15           | 4                        | -4.99(-7.83, -2.15)                  | p<0.001 | 0.0%               |                                  |
|                    | Participants          | Health        | 3                        | -2.84(-5.16, -0.52)                  | p=0.020 | 23.0%              | p=0.910                          |
|                    |                       | Obesity       | 7                        | -3.20(-6.47,0.07)                    | p=0.006 | 73.0%              |                                  |
|                    |                       | Else          | 4                        | -1.89(-6.70, 2.92)                   | p=0.440 | 69.0%              |                                  |
|                    | Intervention<br>Time  | ≤10 weeks     | 7                        | -2.11(-5.01,0.79)                    | p=0.150 | 60.0%              | p=0.530                          |
|                    |                       | >10 weeks     | 7                        | -3.43(-6.30,0.56)                    | p=0.020 | 72.0%              |                                  |

|                    |                    |                    |                  |                      |                   |         |         |
|--------------------|--------------------|--------------------|------------------|----------------------|-------------------|---------|---------|
| DBP                | Exercise Frequency | <3 times/week      | 5                | -3.48(-7.42,0.46)    | p=0.080           | 75.0%   | p=0.067 |
|                    |                    | ≥3 times/week      | 9                | -2.48(-4.78, -0.19)  | p=0.030           | 55.0%   |         |
|                    | Age                | 5 < <15            | 10               | -1.59(-3.93,0.74)    | p=0.180           | 74.0%   | p=0.070 |
|                    |                    | ≥15                | 4                | -4.99(-7.83, -2.15)  | p<0.001           | 0.0%    |         |
|                    | Participants       | Health             | 3                | -2.84(-5.16,0.52)    | p=0.020           | 23.0%   | p=0.940 |
|                    |                    | Obesity            | 7                | -2.52(-5.92,0.89)    | p=0.150           | 79.0%   |         |
|                    |                    | Else               | 4                | -1.89(-6.70,2.92)    | p=0.440           | 69.0%   |         |
|                    | Intervention Time  | ≤10 weeks          | 7                | -1.44(-4.77,1.90)    | p=0.400           | 73.0%   | p=0.37  |
|                    |                    | >10 weeks          | 7                | -3.43(-6.3, -0.56)   | p=0.020           | 72.0%   |         |
|                    | HR <sub>max</sub>  | Exercise Frequency | <3 times/week    | 5                    | -3.48(-7.42,0.46) | p=0.080 | 75.0%   |
| ≥3 times/week      |                    |                    | 9                | -2.00(-4.63,0.44)    | p=0.140           | 69.0%   |         |
| Age                |                    | 5 < <15            | 10               | 7.27(2.12,12.41)     | p=0.006           | 97.0%   | p=0.008 |
|                    |                    | ≥15                | 2                | -2.82(-8.21,2.57)    | p=0.300           | 0.0%    |         |
| Participants       |                    | Health             | 2                | 45.39(-39.87,130.65) | p=0.300           | 100.0%  | p=0.570 |
|                    |                    | Obesity            | 4                | -0.01(-2.47,2.46)    | p=1.000           | 41.0%   |         |
|                    |                    | Else               | 6                | 0.22(-1.50,1.06)     | p=0.740           | 13.0%   |         |
| Intervention Time  |                    | ≤10 weeks          | 8                | 0.09(-1.16,1.34)     | p=0.890           | 14.0%   | p=0.650 |
|                    |                    | >10 weeks          | 3                | -0.48(-2.67,1.70)    | p=0.660           | 35.0%   |         |
| Exercise Frequency |                    | <3 times/week      | 5                | -1.85(-3.86,0.16)    | p=0.070           | 0.0%    | p=0.030 |
|                    | ≥3 times/week      | 6                  | 0.45(-0.02,0.92) | p=0.060              | 3.0%              |         |         |

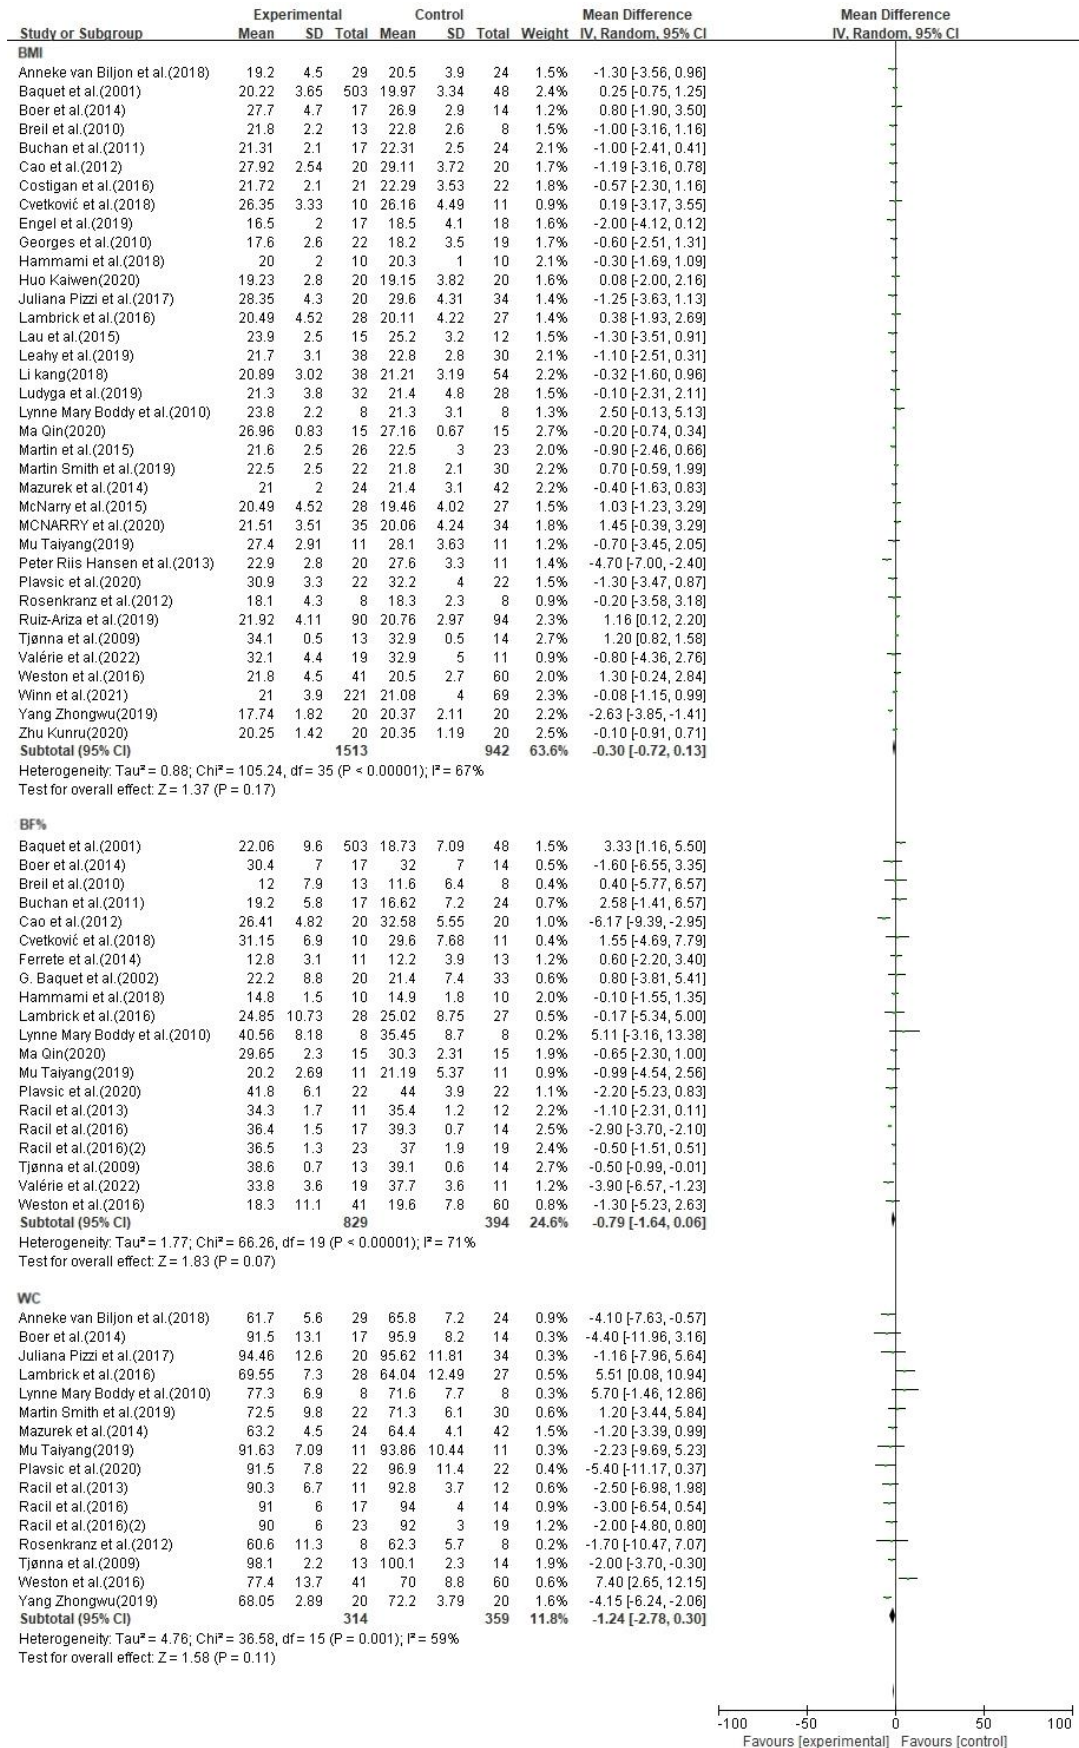

167

168

**Fig. 3** Forest plot of body morphology indicators

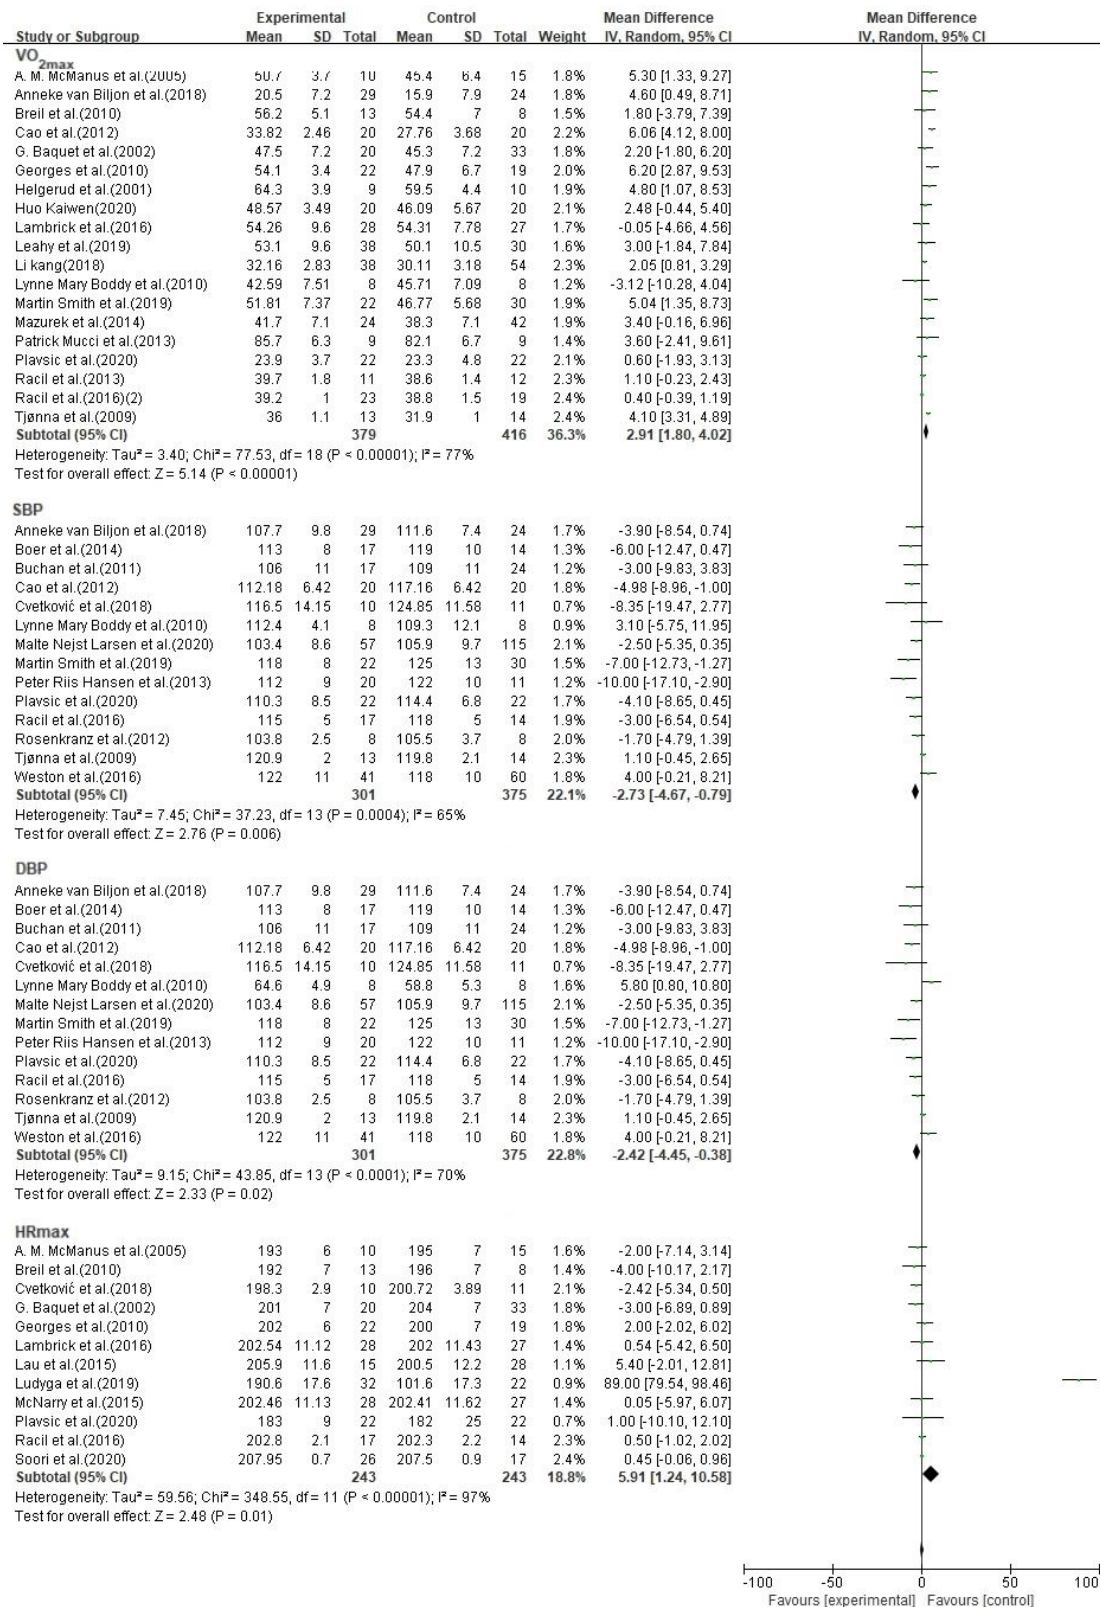

169  
170

Fig. 4 Forest plot of CRF indicators

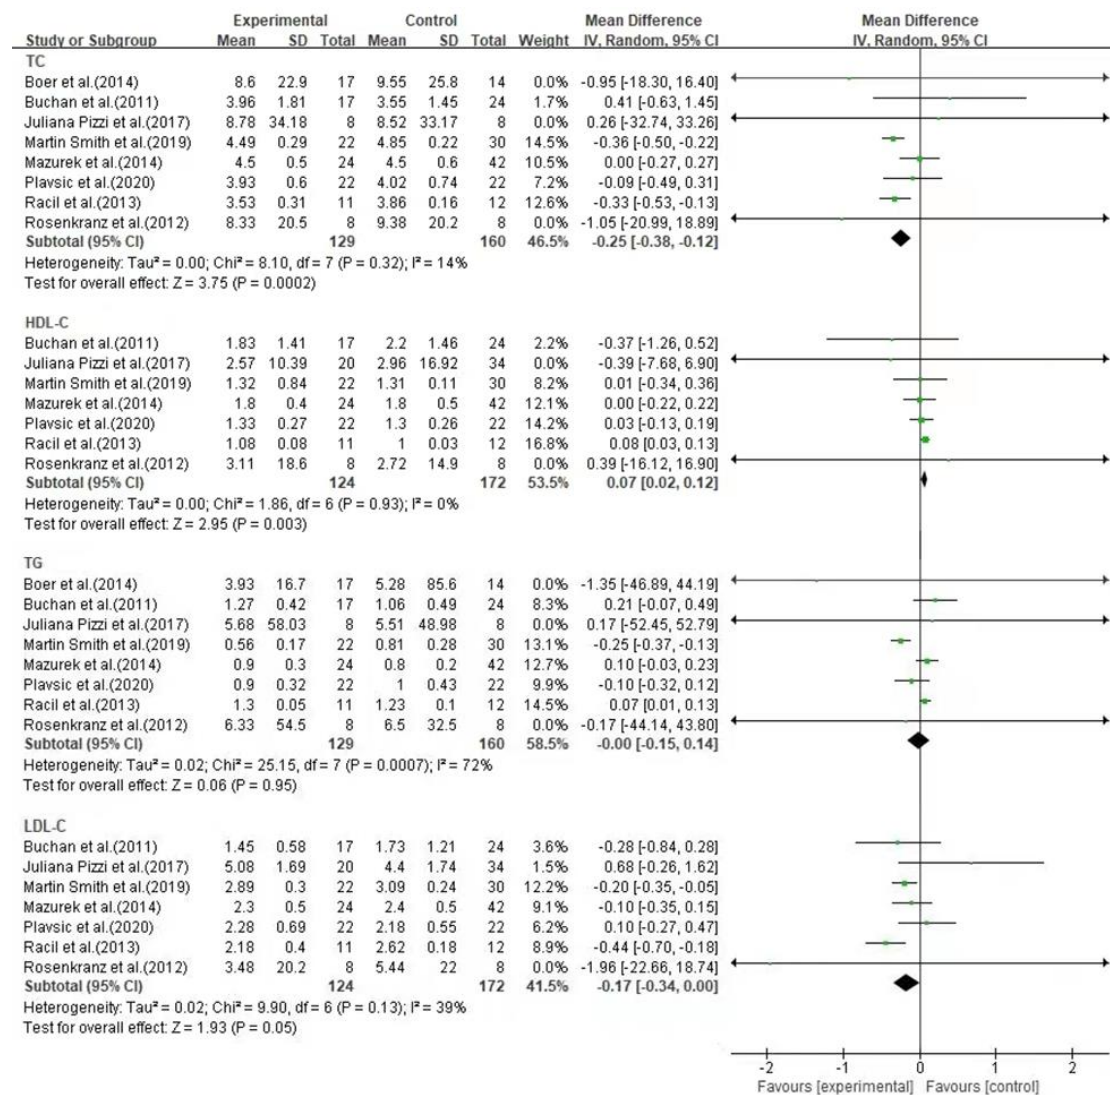

171

172

**Fig. 5** Forest plot of cardiovascular metabolic indicators

173

In 19 studies, HIIT group (n=379) effectively increased VO<sub>2max</sub> [MD=2.91, 95% CI (1.80, 4.02),

174

p<0.001] compared with the control group (n=416) but with higher heterogeneity (I<sup>2</sup>=77%, p<0.001.

175

The results of the subgroup analysis showed that HIIT was more effective in aged 5~15 years (HIIT:

176

n=179, control group: n=189), healthy children and adolescents (HIIT: n=133, control group: n=141),

177

intervention time ≤10 weeks (HIIT: n=244, control group: n=292) and exercise frequency <3 times/week

178

(HIIT: n=179, control group: n=209)

179

In 14 studies, HIIT group (n=301) effectively reduced SBP [MD=-2.73, 95% CI (-4.67, -0.79),

180

p=0.006] compared with the control group (n=375) but with higher heterogeneity (I<sup>2</sup>=65%, p<0.001).



181 The results of the subgroup analysis showed that HIIT was more effective in aged 5~15 years (HIIT: n=  
182 223, control group: n=285), else children and adolescents (HIIT: n=104, control group: n=122),  
183 intervention time  $\leq 10$  weeks (HIIT: n=145, control group: n=174) and exercise frequency  $\geq 3$  times/week  
184 (HIIT: n= 219, control group: n=294).

185 In 14 studies, HIIT group (n=301) effectively reduced DBP [MD=-2.42, 95% CI (-4.45, -0.38),  
186 p=0.02] compared with control group (n=375) but with higher heterogeneity ( $I^2=70\%$ ,  $p<0.001$ ). The  
187 results of the subgroup analysis showed that HIIT was more effective in aged 5~15 years (HIIT: n= 223,  
188 control group: n=285), else children and adolescents (HIIT: n=104, control group: n=122), intervention  
189 time  $\leq 10$  weeks (HIIT: n=145, control group: n=174) and exercise frequency  $\geq 3$  times/week (HIIT:  
190 n=219, control group: n=294).

191 In 12 studies, HIIT group (n=243) and the control group (n=233) had an effective increase in  $HR_{max}$   
192 [MD=5.91, 95% CI (1.24, 10.58), p=0.01] compared with HIIT [MD=5.91, p=0.001] but with higher  
193 heterogeneity ( $I^2=97\%$ ,  $p<0.001$ ). The results of subgroup analysis showed that HIIT was more  
194 effective in aged 5~15 years children (HIIT: n=208, control group: n=101), healthy children and  
195 adolescents (HIIT: n=95, control group: n=82), intervention time  $>10$  weeks (HIIT: n=49, control  
196 group: n=47) and exercise frequency  $<3$  times/week (HIIT: n=108, control group: n=120).

### 197 **Cardiovascular metabolic indicators**

198 In 8 studies, compared with the control group (n=141), the HIIT group (n=186) significantly  
199 improved the metabolic risk index of cardiovascular disease, but some of the indicators were not  
200 statistically significant (Fig. 5).

201 In 8 studies, HIIT (n=141) effectively reduced TC compared with control group (n=186) [MD=-  
202 0.27, 95%CI (-0.38, -0.17),  $p<0.001$ ] with no significant heterogeneity ( $I^2=14\%$ ,  $p=0.32$ ). In 7 studies,

203 compared with the control group (n=172), HIIT (n=124) effectively increased HDL-C [MD=0.07, 95%  
204 CI (0.02, 0.12), p=0.003] without significant heterogeneity ( $I^2=0\%$ , p=0.93). In 8 studies, the effect of  
205 HIIT on TG was not statistically significant between HIIT (n=141) and control group (n=186) [MD=-  
206 0.00, 95% CI (-0.15, 0.14), p=0.95]. In 7 studies, the effect of HIIT on LDL-C was not statistically  
207 significant between HIIT (n=124) and control group (n=172) [MD=-0.17, 95% CI (-0.34, 0.00), p=0.05].

## 208 **DISCUSSION**

209 More and more studies have revealed that physical activity can significantly improve the physical  
210 health of children and adolescents[1]. Nevertheless, the global survey data shows that most children and  
211 adolescents do not meet the standards of physical activity guidelines, which seriously affects their  
212 current and future health[1]. To improve the level of physical activity of children and adolescents and  
213 achieve the goal of reducing the incidence of physical inactivity in children and adolescents by 15% in  
214 2030[5], WHO issued the updated "2020 WHO Guidelines on Physical Activity and Sedentary  
215 Behavior" in 2020, which recommended that children and adolescents should engage in an average of  
216 not less than 60 minutes of moderate-to vigorous-intensity physical activity per day. Because children  
217 and adolescents are concentrated on campus most of the time, considering that physical activity is  
218 limited by time, HIIT is a good choice for its sports characteristics.

219 This study is the first to systematically evaluate the safety and efficacy of HIIT in terms of body  
220 shape, CRF, and cardiovascular disease metabolic risk indicators for children and adolescents of all ages  
221 (including health, obesity and disease) by synthesizing 47 eligible randomized controlled trials. With  
222 strict inclusion and exclusion criteria (age, exercise intensity, exercise frequency and exercise time), 47  
223 studies were assessed. Available evidence shows that HIIT can significantly improve most indicators of  
224 children and adolescents' health: improved CRF indexes ( $VO_{2max}$ , SBP, DBP and  $HR_{max}$ ) and

225 cardiovascular disease metabolic risk indicators (TG and HDL-C). In addition, there is insufficient  
226 evidence that HIIT improves body shape indicators (BMI, BF% and WC) and some cardiometabolic  
227 measures (TG, LDL-C) in children and adolescents.

228 Statistical heterogeneity consisted in most outcome measures due to multiple factors. First, our  
229 meta-analysis includes children and adolescents, who span a wide age range. Since this stage is pre-  
230 pubertal and adolescence, the developmental speed is related to age. Previous studies have shown that  
231 prepubertal children may obtain greater benefits in HIIT[7], and different developmental stages may  
232 affect the assessment of HIIT in body shape indicators. Secondly, the participants included in the study  
233 have healthy, overweight, obese, and partially diseases, together with children and adolescents with  
234 sports training experience, which led to differences in participants at baseline level and affected the  
235 assessment of HIIT outcomes. Third, the study intervention time ranges from 1.57 weeks to 40 weeks,  
236 and it is generally believed that a longer exercise intervention time is more likely to obtain greater  
237 benefits. Finally, the exercise frequency of participants is an essential part of exercise prescription or  
238 exercise program, and the exercise frequency of the included studies varied from 2 to 5 times/week,  
239 which may affect the evaluation of HIIT outcomes.

240 In addition, this study also determined the HIIT dose-response relationship: with interval running as the  
241 primary form of exercise, the exercise intensity is  $\geq 80\%VO_{2max}/\geq 100\%MAS/\geq 80\%HR_{max}$ . For healthy  
242 children and adolescents aged 5~15 years old, the health benefit is the greatest when the intervention time is  
243  $\leq 10$  weeks and the exercise frequency is 2~5 times/week, while children and adolescents aged  $\geq 15$  years  
244 cannot recommend exercise doses due to the limited number of included studies.

245 **Effect of HIIT on body shape of children and adolescents**



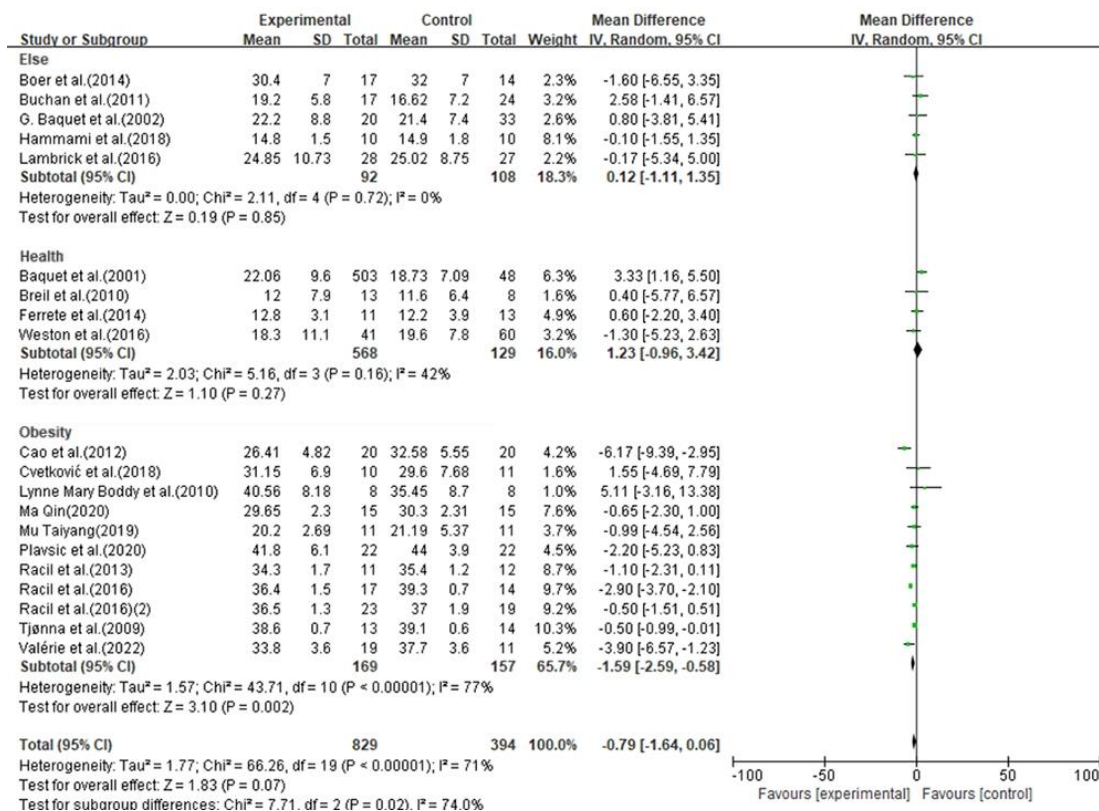

246  
247 **Fig. 6** Participants subgroup analysis of BF% max in children and adolescents in the HIIT group and  
248 the control group

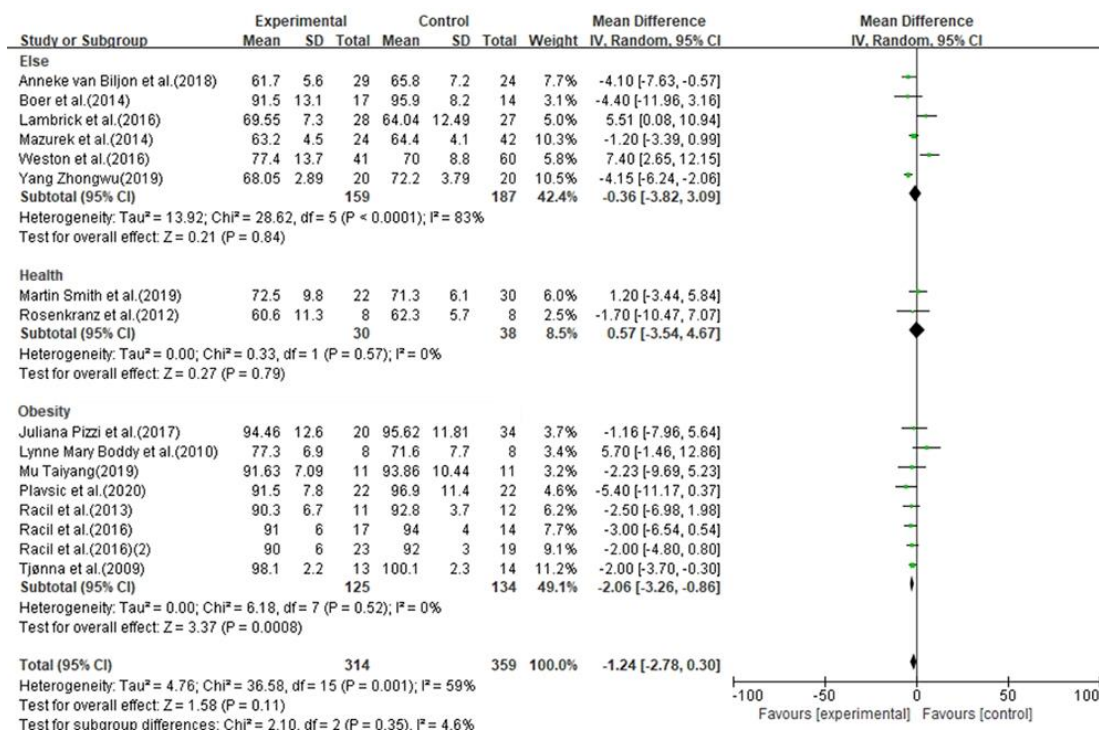

249  
250 **Fig. 7** Participants subgroup analysis of WC max in children and adolescents in the HIIT group and  
251 the control group

252 Previous studies have shown that HIIT can effectively improve the body shape indicator of children

253 and adolescents. There is now insufficient evidence that HIIT improves body shape BMI, BF%, and WC  
254 indicators in children and adolescents. The findings are consistent with previous studies[7, 8], but there  
255 are diametrically opposite conclusions[9]. Although this study showed that HIIT had no significant  
256 effect on the body shape indicators of children and adolescents, it may have a greater impact on the  
257 reliability of the results due to the large range of subjects included in the study. Further analysis found  
258 that HIIT had a significant effect on obese children and adolescents with BF% [MD=-1.59, 95% CI (-  
259 2.59, -0.58), p=0.002] (Fig. 6) and WC [MD=-2.06, 95% CI (-3.26, -0.86)], p<0.001] (Fig. 7), the effect  
260 of the study results was positive, and it had no significant effect on BMI [MD=-0.91, 95% CI (-1.91,  
261 0.09), p=0.08]. Metabolic disorders caused by overweight/obesity are the pathological basis of various  
262 metabolic diseases such as T<sub>2</sub>DM and CVD. Adverse metabolic phenotypes are highly associated with  
263 obesity in children and adolescents. Unfortunately, more than 50% of children and adolescents will carry  
264 obesity into adulthood, and the proportion increases with age[3]. In addition, children and adolescents  
265 with increased BMI will increase the risk of T<sub>2</sub>DM, stroke, coronary heart disease and cancer. As well  
266 as prospective cohort studies have shown that BF% and WC, the two body shape indicators, dropped to  
267 the normal range significantly reducing the prevalence of obesity-related diseases[59]. Therefore, a  
268 healthy body shape in children and adolescents is crucial.

269 At present, the key to the childhood obesity epidemic is inflammation and metabolic disorders.  
270 Anti-inflammatory and antioxidant interventions help regulate inflammation and metabolic disorders  
271 caused by obesity. Significant progress has been made in the prevention and treatment of obesity, but  
272 obesity-related diseases still cannot be effectively controlled. It is worth noting that majority of  
273 childhood and adolescent obesity is caused by insufficient physical activity. The prevalence of obesity  
274 in the physically inactive population has increased and there is still a potential risk in physically inactive

275 non-obese individuals. However, it is gratifying that regular exercise can independently reduce the risks  
276 of obesity due to metabolic disorders, such as T<sub>2</sub>DM, CVD, and cancer, and can play a critical role in  
277 related diseases[4]. Particularly early exercise interventions are more effective in children and  
278 adolescents. Recent research has shown that running-based HIIT can improve the physical health of  
279 obese teenagers, and it is suggested to conduct a larger-scale survey of participants from different  
280 schools[10].

281 What's more, we found a subset of athletes in healthy children and adolescents[30, 44, 52]. The  
282 research subjects were other children and adolescents with partial intellectual disability[43] and non-  
283 uniform subjects (the included participants were overweight, obese and healthy children and adolescents,  
284 and the data could not be classified and extracted)[35, 37]. There may be certain data risks due to the  
285 inconsistency of the population classification of the study subjects.

286 The sensitivity analysis of this meta-analysis results in high stability, and we can conclude that although  
287 HIIT does not improve body shape indicators in children and adolescents, its recommendation for obese  
288 children and adolescents should be retained.

### 289 **Effect of HIIT on CRF in children and adolescents**

290 CRF has become one of the most extensive components of physical health research because of its strong  
291 correlation with health outcomes. Strong epidemiological evidence suggests that CRF is inversely associated  
292 with a high incidence of CVD, all-cause mortality and cancer in the healthy population. CRF can be used as  
293 a predictor of cancer mortality, and higher levels of CRF can independently reduce cancer mortality in women  
294 and men[60]. This study confirmed that HIIT is an effective method to improve CRF indicators in children  
295 and adolescents, and the findings are consistent with those of most meta-analysis studies. Because of the  
296 differences in whether research subjects are obese or not, there is still controversy about HIIT replacing

297 MICT[9], still, it has gradually been widely accepted because HIIT is more cost-effective. Although the  
298 relationship between physical activity and the incidence and mortality of CVD, T<sub>2</sub>DM and cancer, etc. and its  
299 preventive effect have been demonstrated, children and adolescents still face the plight of insufficient physical  
300 activity. Extensive research has been carried out in the field of sports medicine, and a great many of research  
301 results has been obtained.

302 Our meta-analysis results show that HIIT can effectively improve the CRF index, but there is some  
303 statistical heterogeneity. We conducted a subgroup analysis of CRF index heterogeneity, and found that  
304 the participants were the source of VO<sub>2max</sub> heterogeneity; age and exercise frequency are the source of  
305 HR<sub>max</sub> heterogeneity. However, age, participants, intervention time and exercise frequency are not  
306 heterogeneous sources of SBP and DBP.

307 VO<sub>2max</sub> is the gold standard for evaluating CRF. Obese children and adolescents exhibit considerable  
308 limitations in physical activity due to skeletal muscle oxidative disorders in obese children and adolescents.  
309 Considering the influence of weight on VO<sub>2max</sub> level, The VO<sub>2max</sub> of obese children and adolescents' overall  
310 baseline level is low, and its change is more sensitive to HIIT intervention. In contrast, the VO<sub>2max</sub> level in  
311 healthy children and adolescents tends to be stable.

312 Our results show that age is the main source of heterogeneity in HR<sub>max</sub>. According to the actual situation  
313 of included studies, in this subgroup analysis, ages between 5~15 years old and ≥15 years old were divided  
314 into groups. Although not grouped by pre-pubertal and adolescence, the actual grouping covers prepubertal  
315 and adolescent ages to a greater extent.

316 In this subgroup analysis, the proportion of obese adolescents aged ≥15 years in this subgroup analysis  
317 is more[16, 36, 38, 49]. Children are more resilient, making them more tolerant of HIIT and more resistant  
318 to fatigue than adolescents. More importantly, HIIT is more closely related to children's exercise habits,

319 combined with children's exercise patterns (game)[35]and reward mechanisms[53, 55, 56]in the included  
320 studies, which make pre-adolescent children more autonomous and motivated to participate.

321 It is worth noting that high-intensity training triggers autonomic nervous disturbances and high exercise  
322 frequency triggers fatigue accumulation while also causing a "compensatory effect". Subgroup analysis  
323 included 6 studies [18, 36, 41, 51, 52, 55] with exercise frequency  $\geq 3$  times/week. Since children's tolerance,  
324 autonomy and motivation to participate are more advantageous than adolescents, a study has shown that  $HR_{max}$   
325 has the potential to predict  $VO_{2max}$ , which also further confirms the role of age in  $HR_{max}$  and  $VO_{2max}$  [MD =  
326 3.99, 95% CI (2.76, 5.22),  $p < 0.001$ ]. Future research is supposed to pay attention to the dose-response  
327 relationship in exercise frequency towards CRF and focus on the interest and reward mechanism of HIIT in  
328 pre-puberty children during the specific implementation process. Simultaneously, improve the design of HIIT  
329 in adolescents to enhance their initiative and motivation to participate.

330 According to the available evidence, we can conclude that the intervention time  $\leq 10$  weeks, the frequency  
331 of exercise  $< 3$  times/week, and healthy children and adolescents aged 5~15 are more sensitive to improving  
332  $VO_{2max}$  after HIIT intervention. The intervention time  $> 10$  weeks, the frequency of exercise  $< 3$  times/week,  
333 and healthy children and adolescents aged 5~15 are more sensitive to improving  $HR_{max}$  after HIIT intervention.  
334 Although partial results fail to explain the source of heterogeneity,  $VO_{2max}$  and  $HR_{max}$ , which are considered  
335 to the most important outcome indicators for evaluating CRF, well explain the heterogeneity. Despite certain  
336 sources of heterogeneity in SBP and DBP, their sensitivity analysis still suggests that the results are stable  
337 due to their relatively mature measurement methods. In summary, HIIT is recommended for improving CRF  
338 indicators in children and adolescents.

### 339 **Effect of HIIT on metabolic risk indicators of CVD in children and adolescents**

340 At present, insufficient physical activity, unreasonable dietary structure, obesity, metabolic syndrome

341 and other metabolic risk factors for cardiovascular disease are gradually superimposed, resulting in a sharp  
342 increase in the risk of CVD and T<sub>2</sub>DM. Metabolic risk factors of cardiovascular disease in children and  
343 adolescents during this period have a significant influence on the onset of adulthood[3]. The good news is  
344 that cardiovascular risk factors are largely preventable, especially the effectiveness of exercise in improving  
345 metabolic risk markers for cardiovascular diseases is supported by substantial evidence.

346 According to our research, a meta-analysis of HIIT intervention in children and adolescents, HIIT was  
347 effective in improving TC and HDL-C that are metabolic risk index of cardiovascular disease in children and  
348 adolescents, still, the effect on TG and LDL-C appeared to be insignificant. The results of this meta-analysis  
349 are similar to the previous meta-analysis results[7], but there are some differences in the analysis of HIIT  
350 evaluation on children and adolescents in another study[8], whose difference may be caused by HIIT's limited  
351 improvement of healthy children and adolescent blood lipids[42]. Most of the crowds we have included are  
352 healthy children and adolescents, and their incorporations are mostly obese children and adolescents.

353 Our convergence analysis results show that HIIT can effectively improve the level of TC and HDL-  
354 C, without significant heterogeneity. Racil[45] and Boer et al.[43] reported that HIIT reduced TC in  
355 children and adolescents with a clinically significant ( $P<0.05$ ) and low risk of bias assessment, which  
356 are encouraging findings. Notably, Racil et al.[45] evaluated obese girls and Boer et al.[43] evaluated  
357 children and adolescents with disabilities. Racil[45] and Juliana et al.[33] reported that HIIT reduced  
358 HDL-C in children and adolescents with clinical significance ( $p<0.05$ ). Racil et al.[45] and Plavsic et  
359 al.[16] evaluated objects are obese girls. The limitations of study methods and subjects for TG and HDL-  
360 C in the included studies may confuse the results, so caution should be exercised in interpreting these  
361 results. Though HIIT does not improve TG and LDL-C levels, the importance of TG as an independent  
362 risk factor for CVD cannot be ignored. The effect of HIIT on LDL-C [MD=-0.17, 95% CI (-0.34, 0.00),

363 p=0.05] was at a statistical critical value. After excluding the included studies one by one, it found that  
364 the study by Juliana et al. [33] had a high risk. After the exclusion, the effect of HIIT on LDL-C was  
365 statistically significant ( $p<0.001$ ) and there was no significant heterogeneity ( $I^2=24\%$ ,  $p=0.25$ ).

366 The sensitivity analysis results in this meta-analysis were highly stable and showed no significant  
367 heterogeneity. We can conclude that HIIT is effective in improving TC and HDL-C in children and  
368 adolescents, with little effect on TG and LDL-C. Considering the small sample size included in this  
369 meta-analysis, future research requires expanding the sample size further.

### 370 **Assessment of diet and leisure-time physical activity**

371 35 studies[13-15, 17, 19-35, 39, 41, 43, 47-53, 55-58] did not describe dietary assessment in detail. 12  
372 studies[12, 16, 19, 36-38, 40, 42, 44-46, 54]informed not to change dietary habits. 35 studies[12-15, 17,  
373 18, 20-28, 30-35, 39, 41, 43, 45, 48-53, 55-58]did not describe leisure-time physical activity in detail, and12  
374 studies[16, 19, 29, 36-38, 40, 42, 44, 46, 47, 54]conducted detailed assessments of leisure-time physical  
375 activity. Although 74.47% of the studies did not describe the diet in detail, it can be understood as maintaining  
376 the original eating habits and physical activities by reading the full text. Furthermore, although 25.53% were  
377 assessed for dietary habits and leisure-time physical activity, the impact of dietary and leisure-time physical  
378 activity assessments on outcomes was not elucidated. It is worth noting that maintaining the original dietary  
379 habits and physical activity helps to rule out the influence of diet on HIIT outcomes, simultaneously diet and  
380 leisure physical activity may be important limiting factors and sources of bias.

### 381 **Adverse events and compliance**

382 In this meta-analysis, although only 21 studies [12, 16, 18, 22, 26-29, 37, 38, 40, 43-45, 48, 50-52,  
383 54, 55, 58] (42.55%) reported withdrawal events due to family and subjective will (193 people dropped out,  
384 accounting for 6.445 of the total study, with a dependency of 93.56%). In addition, there were sicked children



385 and adolescents in the included studies[13, 15, 18, 43], but no adverse events occurred, and the safety and  
386 dependence were good. A previous meta-analysis of HIIT reported the occurrence of adverse events such as  
387 leg discomfort, joint sprains, asthma, myocardial infarction, etc[61]. The occurrence of adverse events was  
388 attributed to the study subjects belonging to high-risk groups for adverse events, such as patients with  
389 coronary heart disease and hypertension, but there seemed to be no difference in adverse events between the  
390 HIIT group and the control group. Besides, medical supervision was described in 55.32% of the included  
391 articles in this meta-analysis. Therefore, these factors may cause biases, but the results were skewed towards  
392 more positive effects.

### 393 **Advantages and limitations**

394 Advantages of this study: (i) Retrieval was not limited by publication date. (ii) Research  
395 participants were not limited to specific children and adolescents but includes all children and  
396 adolescents, regardless of health, disease, etc. (iii) Subgroup analysis was carried out to explain the  
397 heterogeneity of research results, especially the analysis of exercise dose variables such as age  
398 (prepubertal and adolescence), research subjects, intervention time and exercise frequency, which were  
399 often ignored by previous studies. (iv) No-blank control was excluded in this study, and unbalanced  
400 results caused due to non-blank control were avoided.

401 Limitations of this study: (i) Although this review strictly implemented the retrieval strategy, due  
402 to limited conditions, only the literature published in Chinese and English were retrieved, and there may  
403 still be some publication bias due to the lack of a small number of published literatures. (ii) This study  
404 only included the information on children and adolescents in school, but lacks data about children and  
405 adolescents outside of school, which may have a certain influence on the conclusion. (iii) Quality of  
406 included studies may be another factor, 12.77% of the studies did not use the randomized control model,



407 and 17.02% of the studies reported the randomized control model, but did not describe the randomized  
408 process. (iv) Although guidelines for HIIT have been established, the details of some guidelines still  
409 need to be refined. (v) The biggest limiting factor may be that the age span of the individuals included  
410 in the study was large, and important influencing factors such as exercise intensity, frequency, and time  
411 were not completely consistent, and the heterogeneity was considerable.

412 Although subgroup analyses have been performed, some results still could not clarify the source of  
413 heterogeneity. For example, Sexual differences in developmental rates during childhood and  
414 adolescence (due to the mixed-gender or too small sample size for subgroup analysis), different methods  
415 of outcome measures, and diet and leisure-time physical activity may all be sources of heterogeneity. In  
416 addition, the included studies did not disaggregate by gender, and the impact of gender on children and  
417 adolescents was still unclear, so gender differences should be fully considered in future research.

## 418 **CONCLUSION**

419 HIIT is safe, effective and less time-consuming for child and adolescent health. Because of its  
420 potential to improve body shape, CRF, and cardiovascular disease risk markers, it should be  
421 incorporated into the daily management of physical activity in children and adolescents. More  
422 importantly, the effect of HIIT has a higher consistency in gender, population, and age (pre-adolescence  
423 and adolescence), so it has a higher generality in improving physical health. Although there were  
424 dropouts and losses to follow-up during this process, no adverse events caused by HIIT occurred. These  
425 findings highlight the potential role of HIIT as a strategy for improving the health between children and  
426 adolescents. Considering the lack of more detailed standards for HIIT interventions in the included  
427 studies, it is worth studying specific HIIT interventions (optimal exercise interval time and interval  
428 intensity) in different ages, genders and participants to make HIIT more effective and scientific.

429 In conclusion, strengthening medical supervision and adequate warm-up before exercise is more  
430 feasible for the promotion of HIIT in children and adolescents.

#### 431 **Funding Information**

432 The co-funding of the Teaching Reform and Innovation Project of Shanxi Provincial Department  
433 of Education (J2021967) and the Teaching Reform and Innovation Project of Fenyang College of Shanxi  
434 Medical University (FJ202013).

#### 435 **Acknowledgment:**

436 The completion of the thesis is very grateful to the co-funding of the Teaching Reform and  
437 Innovation Project of Shanxi Provincial Department of Education (J2021967) and the Teaching  
438 Reform and Innovation Project of Fenyang College of Shanxi Medical University (FJ202013). Many  
439 thanks to the authors for their hard work.

#### 440 **Author's contribution:**

441 Menjie made the agreement on this manuscript and revised it; Ma Jia, Zou Shuangling and Xiang  
442 Chenmin run a database search, selected included meta-analysis, evaluate its quality and extract data;  
443 Xiang Chenmin, Zou Shuangling and Wang Junli made statistical analysis; Li Shufeng contributed to  
444 the formulation of the protocol and revised the manuscript. All authors have read and approved the final  
445 version of the manuscript and agreed to the author's presentation order.

#### 446 **Statement of Conflict of Interest:**

447 The authors declare that there is no conflict of interest.

## 448 **References:**

- 449 1. Guthold R, Stevens GA, Riley LM, Bull FC. Global trends in insufficient physical activity among adolescents:  
450 a pooled analysis of 298 population-based surveys with 1.6 million participants. *The Lancet Child & Adolescent*  
451 *Health*. 2020;4(1):23-35.
- 452 2. Guthold R, Stevens GA, Riley LM, Bull FC. Worldwide trends in insufficient physical activity from 2001 to  
453 2016: a pooled analysis of 358 population-based surveys with 1.9 million participants. *LANCET GLOB HEALTH*.

- 454 2018 2018-10-01;6(10):e1077-86.
- 455 3. Wehrauch-Bluher S, Schwarz P, Klusmann JH. Childhood obesity: increased risk for cardiometabolic  
456 disease and cancer in adulthood. *METABOLISM*. 2019 2019-03-01;92:147-52.
- 457 4. Bell LA, Fletcher EA, Timperio A, Vuillermin P, Hesketh K. Preschool children's physical activity and  
458 cardiovascular disease risk: A systematic review. *J SCI MED SPORT*. 2019;22(5):568-73.
- 459 5. WHO. Global action plan on physical activity 2018-2030: more active people for a healthier world. World  
460 Health Organization. 2018.
- 461 6. Schoenmakers PPJM, Reed KE. The effects of recovery duration on physiological and perceptual responses  
462 of trained runners during four self-paced HIIT sessions. *J SCI MED SPORT*. 2019;22(4):462-6.
- 463 7. Eddolls WTB, McNarry MA, Stratton G, Winn CON, Mackintosh KA. High-Intensity Interval Training  
464 Interventions in Children and Adolescents: A Systematic Review. *SPORTS MED*. 2017;47(11):2363-74.
- 465 8. Monserrat Solera-Martínez ÁHIM. High-Intensity Interval Training and Cardiometabolic Risk Factors in  
466 Children: A Meta-analysis. *PEDIATRICS*. 2021;148(4):e2021050810.
- 467 9. Liu J, Zhu L, Su Y. Comparative Effectiveness of High-Intensity Interval Training and Moderate-Intensity  
468 Continuous Training for Cardiometabolic Risk Factors and Cardiorespiratory Fitness in Childhood Obesity: A  
469 Meta-Analysis of Randomized Controlled Trials. *FRONT PHYSIOL*. 2020 2020-04-03;11.
- 470 10. Meng C, Yucheng T, Shu L, Yu Z. Effects of school-based high-intensity interval training on body  
471 composition, cardiorespiratory fitness and cardiometabolic markers in adolescent boys with obesity: a randomized  
472 controlled trial. *BMC PEDIATR*. 2022;22(1).
- 473 11. Blegen MA. *PRISMA. Nursing research (New York)*. 2010 2010-01-01;59(4):233.
- 474 12. Julian V, Costa D, O Malley G, Metz L, Fillon A, Miguet M, et al. Bone Response to High-Intensity Interval  
475 Training versus Moderate-Intensity Continuous Training in Adolescents with Obesity. *OBESITY FACTS*.  
476 2022;15(1):46-54.
- 477 13. Winn CON, Mackintosh KA, Eddolls WTB, Stratton G, Wilson AM, McNarry MA, et al. Effect of high-  
478 intensity interval training in adolescents with asthma: The eXercise for Asthma with Commando Joe's® (X4ACJ)  
479 trial. *J SPORT HEALTH SCI*. 2021;10(4):488-98.
- 480 14. Xiangdi D. Research on the Design and Effect of HIIT in Middle School Physical Education: Jiangnan  
481 University; 2021.
- 482 15. MCNARRY MA, WINN CON, DAVIES GA, EDDOLLS WTB, MACKINTOSH KA. Effect of High-  
483 Intensity Training and Asthma on the VO2 Kinetics of Adolescents. *Medicine & Science in Sports & Exercise*.  
484 2020;52(6):1322-9.
- 485 16. Plavsic L, Knezevic OM, Sovtic A, Minic P, Vukovic R, Mazibrada I, et al. Effects of high-intensity interval  
486 training and nutrition advice on cardiometabolic markers and aerobic fitness in adolescent girls with obesity.  
487 *Applied physiology, nutrition, and metabolism*. 2020 2020-01-01;45(3):294-300.
- 488 17. Larsen MN, Madsen M, Nielsen CM, Manniche V, Hansen L, Bangsbo J, et al. Cardiovascular adaptations  
489 after 10months of daily 12-min bouts of intense school-based physical training for 8-10-year-old children. *PROG*  
490 *CARDIOVASC DIS*. 2020 2020-11-01;63(6):813-7.
- 491 18. Soori R, Goodarzvand F, Akbarnejad A, Effatpanah M, Ramezankhani A, Teixeira AL, et al. Effect of high-  
492 intensity interval training on clinical and laboratory parameters of adolescents with attention deficit hyperactivity  
493 disorder. *SCI SPORT*. 2020;35(4):207-15.
- 494 19. Kunru Z. An experimental study on the effect of high intensity intermittent skipping training on the fitness  
495 of High School girls Take Yudan University Affiliated Middle School (Qingpu Branch) as an example:  
496 Shanghai University of Sport; 2020.
- 497 20. Kaiwen H. Study on the application of high intensity interval training as "Exercise each class" in Junior

- 498 middle school grade one physical education class: Shanxi Normal University; 2020.
- 499 21. Qin M. Research on Aerobic Exercise and TABATA Training ' s Intervention on Exercise Ability and Cardiac  
500 Autonomic Nervous Function in Obese Adolescents Aged 13 to 15: Liaoning Normal University; 2020.
- 501 22. Engel FA, Wagner MO, Schelhorn F, Deubert F, Leutzsch S, Stolz A, et al. Classroom-Based Micro-Sessions  
502 of Functional High-Intensity Circuit Training Enhances Functional Strength but Not Cardiorespiratory Fitness in  
503 School Children—A Feasibility Study. *Frontiers in Public Health*. 2019 2019-11-14;7.
- 504 23. Leahy AA, Eather N, Smith JJ, Hillman CH, Morgan PJ, Plotnikoff RC, et al. Feasibility and Preliminary  
505 Efficacy of a Teacher-Facilitated High-Intensity Interval Training Intervention for Older Adolescents. *PEDIATR  
506 EXERC SCI*. 2019;31(1):107-17.
- 507 24. Taiyang M. Effect of high intensity interval training on body weight control and physical fitness of Judo  
508 athletes: Capital University of Physical Education And Sports; 2019.
- 509 25. Zhongwu Y. Experimental Research on the Effect of High intensity Interval Training and Continuous  
510 Training on Physical Fitness and Health Adolescent: Capital University of Physical Education And Sports;  
511 2019.
- 512 26. Martin-Smith R, Buchan DS, Baker JS, Macdonald MJ, Sculthorpe NF, Easton C, et al. Sprint Interval  
513 Training and the School Curriculum: Benefits Upon Cardiorespiratory Fitness, Physical Activity Profiles, and  
514 Cardiometabolic Risk Profiles of Healthy Adolescents. *PEDIATR EXERC SCI*. 2019;31(3):296-305.
- 515 27. Ludyga S, Pühse U, Lucchi S, Marti J, Gerber M. Immediate and sustained effects of intermittent exercise  
516 on inhibitory control and task-related heart rate variability in adolescents. *J SCI MED SPORT*. 2019;22(1):96-100.
- 517 28. Ruiz-Ariza A, Suárez-Manzano S, López-Serrano S, Martínez-López EJ. The effect of cooperative high-  
518 intensity interval training on creativity and emotional intelligence in secondary school: A randomised controlled  
519 trial. *EUR PHYS EDUC REV*. 2019;25(2):355-73.
- 520 29. Cvetković N, Stojanović E, Stojiljković N, Nikolić D, Scanlan AT, Milanović Z. Exercise training in  
521 overweight and obese children: Recreational football and high-intensity interval training provide similar benefits  
522 to physical fitness. *SCAND J MED SCI SPOR*. 2018;28:18-32.
- 523 30. Hammami A, Randers MB, Kasmi S, Razgallah M, Tabka Z, Chamari K, et al. Effects of soccer training on  
524 health-related physical fitness measures in male adolescents. *J SPORT HEALTH SCI*. 2018;7(2):169-75.
- 525 31. Kang L. Experimental Study on the Effect of High Intensity Interval Training on the Physical Health of High  
526 School Girls: Shanxi Normal University; 2018.
- 527 32. van Biljon A, McKune AJ, DuBose KD, Kolanisi U, Semple SJ. Do Short-Term Exercise Interventions  
528 Improve Cardiometabolic Risk Factors in Children? *The Journal of pediatrics*. 2018 2018-01-01;203:325-9.
- 529 33. Juliana Pizzi LFDS. Reduction in Butyrylcholinesterase Activity and Cardiovascular Risk Factors in Obese  
530 Adolescents after 12-Weeks of High-Intensity Interval Training. *Journal of Exercise Physiology online*.  
531 2017;20(3):110-20.
- 532 34. Costigan SA, Eather N, Plotnikoff RC, Hillman CH, Lubans DR. High-Intensity Interval Training for  
533 Cognitive and Mental Health in Adolescents. *Med Sci Sports Exerc*. 2016 2016-10-01;48(10):1985-93.
- 534 35. Lambrick D, Westrupp N, Kaufmann S, Stoner L, Faulkner J. The effectiveness of a high-intensity games  
535 intervention on improving indices of health in young children. *J Sports Sci*. 2016 2016-01-20;34(3):190-8.
- 536 36. Racil G, Coquart J, Elmontassar W, Haddad M, Goebel R, Chaouachi A, et al. Greater effects of high-  
537 compared with moderate-intensity interval training on cardio-metabolic variables, blood leptin concentration and  
538 ratings of perceived exertion in obese adolescent females. *BIOL SPORT*. 2016 2016-03-06;33(2):145-52.
- 539 37. Weston KL, Azevedo LB, Bock S, Weston M, George KP, Batterham AM. Effect of Novel, School-Based  
540 High-Intensity Interval Training (HIT) on Cardiometabolic Health in Adolescents: Project FFAB (Fun Fast  
541 Activity Blasts) - An Exploratory Controlled Before-And-After Trial. *PLOS ONE*. 2016 2016-08-

- 542 03;11(8):e159116.
- 543 38. Racil G, Zouhal H, Elmontassar W, Abderrahmane AB, De Sousa MV, Chamari K, et al. Plyometric exercise  
544 combined with high-intensity interval training improves metabolic abnormalities in young obese females more so  
545 than interval training alone. *Applied Physiology, Nutrition, and Metabolism*. 2016 2016-01-01;41(1):103-9.
- 546 39. McNarry MA, Lambrick D, Westrupp N, Faulkner J. The influence of a six-week, high-intensity games  
547 intervention on the pulmonary oxygen uptake kinetics in prepubertal obese and normal-weight children. *Applied*  
548 *Physiology, Nutrition, and Metabolism*. 2015;40(10):1012-8.
- 549 40. Martin R, Buchan D, Baker J, Young J, Sculthorpe N, Grace F. Sprint interval training (SIT) is an effective  
550 method to maintain cardiorespiratory fitness (CRF) and glucose homeostasis in Scottish adolescents. *BIOL*  
551 *SPORT*. 2015 2015-08-04;32(4):307-13.
- 552 41. Lau PW, Wong DP, Ngo JK, Liang Y, Kim CG, Kim HS. Effects of high-intensity intermittent running  
553 exercise in overweight children. *EUR J SPORT SCI*. 2015 2015-01-20;15(2):182-90.
- 554 42. Mazurek K, Krawczyk K, Zmijewski P, Norkowski H, Czajkowska A. Effects of aerobic interval training  
555 versus continuous moderate exercise programme on aerobic and anaerobic capacity, somatic features and blood  
556 lipid profile in collegiate females. *Ann Agric Environ Med*. 2014 2014-01-20;21(4):844-9.
- 557 43. Boer P, Meeus M, Terblanche E, Rombaut L, Wandele ID, Hermans L, et al. The influence of sprint interval  
558 training on body composition, physical and metabolic fitness in adolescents and young adults with intellectual  
559 disability: a randomized controlled trial. *CLIN REHABIL*. 2014;28(3):221-31.
- 560 44. Ferrete C, Requena B, Suarez-Arrones L, de Villarreal ES. Effect of Strength and High-Intensity Training on  
561 Jumping, Sprinting, and Intermittent Endurance Performance in Prepubertal Soccer Players. *J STRENGTH COND*  
562 *RES*. 2014;28(2):413-22.
- 563 45. Racil G, Ben Ounis O, Hammouda O, Kallel A, Zouhal H, Chamari K, et al. Effects of high vs. moderate  
564 exercise intensity during interval training on lipids and adiponectin levels in obese young females. *EUR J APPL*  
565 *PHYSIOL*. 2013;113(10):2531-40.
- 566 46. Hansen PR, Andersen LJ, Rebelo AN, Brito J, Hornstrup T, Schmidt JF, et al. Cardiovascular effects of 3  
567 months of football training in overweight children examined by comprehensive echocardiography: a pilot study. *J*  
568 *Sports Sci*. 2013 2013-01-20;31(13):1432-40.
- 569 47. Mucci P, Baquet G, Nourry C, Deruelle F, Berthoin S, Fabre C. Exercise testing in children: Comparison in  
570 ventilatory thresholds changes with interval-training. *PEDIATR PULM*. 2013;48(8):809-16.
- 571 48. Rosenkranz SK, Rosenkranz RR, Hastmann TJ, Harms CA. High-intensity training improves airway  
572 responsiveness in inactive nonasthmatic children: evidence from a randomized controlled trial. *J APPL PHYSIOL*.  
573 2012 2012-04-01;112(7):1174-83.
- 574 49. Feng C, CaoJie, Zhao L, He L. Effects of aerobic interval training on cardiac function and physical fitness in  
575 obese teenagers. *Journal of Jilin University (Medical edition)*. 2012 2012-05-28;38(03):586-9.
- 576 50. Buchan DS, Young JD, Simpson AD, Thomas NE, Cooper S, Baker JS. The effects of a novel high intensity  
577 exercise intervention on established markers of cardiovascular disease and health in Scottish adolescent youth.  
578 *Journal of Public Health Research*. 2012 2012-05-25;1(2):24.
- 579 51. Baquet G, Gamelin FX, Mucci P, Thevenet D, Van Praagh E, Berthoin S. Continuous vs. interval aerobic  
580 training in 8- to 11-year-old children. *J STRENGTH COND RES*. 2010 2010-05-01;24(5):1381-8.
- 581 52. Breil FA, Weber SN, Koller S, Hoppeler H, Vogt M. Block training periodization in alpine skiing: effects of  
582 11-day HIT on VO<sub>2</sub>max and performance. *EUR J APPL PHYSIOL*. 2010;109(6):1077-86.
- 583 53. Lynne Mary Boddy GSAF. The effectiveness of a 'short, sharp, shock' high intensity exercise intervention  
584 in 11- and 12-year-old Liverpool schoolgirls. *Arch Exerc Health Dis*. 2010;1(1):19-25.
- 585 54. Tjønnå AE, Stølen TO, Bye A, Volden M, Slørdahl SA, Ødegård R, et al. Aerobic interval training reduces

- 586 cardiovascular risk factors more than a multitreatment approach in overweight adolescents. *CLIN SCI*. 2009 2009-  
587 02-01;116(4):317-26.
- 588 55. McManus AM, Cheng CH, Leung MP, Yung TC, Macfarlane DJ. Improving Aerobic Power in Primary  
589 School Boys: A Comparison of Continuous and Interval Training. *INT J SPORTS MED*. 2005;26(9):781-6.
- 590 56. Baquet G, Berthoin S, Dupont G, Blondel N, Fabre C, van Praagh E. Effects of high intensity intermittent  
591 training on peak VO<sub>2</sub> in prepubertal children. *INT J SPORTS MED*. 2002 2002-08-01;23(6):439-44.
- 592 57. Baquet G, Berthoin S, Gerbeaux M, Van Praagh E. High-intensity aerobic training during a 10 week one-  
593 hour physical education cycle: effects on physical fitness of adolescents aged 11 to 16. *INT J SPORTS MED*. 2001  
594 2001-05-01;22(4):295-300.
- 595 58. Helgerud J, Engen LC, Wisloff U, Hoff J. Aerobic endurance training improves soccer performance. *Med*  
596 *Sci Sports Exerc*. 2001 2001-11-01;33(11):1925-31.
- 597 59. Juonala M, Magnussen CG, Berenson GS, Venn A, Burns TL, Sabin MA, et al. Childhood adiposity, adult  
598 adiposity, and cardiovascular risk factors. *N Engl J Med*. 2011 2011-11-17;365(20):1876-85.
- 599 60. Kodama S, Saito K, Tanaka S, Maki M, Yachi Y, Asumi M, et al. Cardiorespiratory Fitness as a Quantitative  
600 Predictor of All-Cause Mortality and Cardiovascular Events in Healthy Men and Women: A Meta-analysis. *JAMA :*  
601 *the journal of the American Medical Association*. 2009 2009-01-01;301(19):2024-35.
- 602 61. Martland R, Mondelli V, Gaughran F, Stubbs B. Can high-intensity interval training improve physical and  
603 mental health outcomes? A meta-review of 33 systematic reviews across the lifespan. *J Sports Sci*. 2020 2020-02-  
604 01;38(4):430-69.
- 605

**Table 1** Full-search strategy for PubMed.

| <b>Number</b> | <b>Search terms</b>                                                                                                                                                                                                                       |
|---------------|-------------------------------------------------------------------------------------------------------------------------------------------------------------------------------------------------------------------------------------------|
| #1            | Adolescent [MeSH Terms]                                                                                                                                                                                                                   |
| #2            | (((((Adolescence [Title/Abstract]) OR (Teens [Title/Abstract])) OR (Teenagers [Title/Abstract])) OR (Youths [Title/Abstract])) OR (Female Adolescents [Title/Abstract])) OR (Male Adolescents [Title/Abstract])                           |
| #3            | #1 or #2                                                                                                                                                                                                                                  |
| #4            | High-Intensity Interval Training [MeSH Terms]                                                                                                                                                                                             |
| #5            | (((((High-Intensity Interval [Title/Abstract]) OR (High-Intensity Intermittent [Title/Abstract])) OR (High-Intensity Intermittent Exercises [Title/Abstract])) OR (Sprint Interval Trainings [Title/Abstract])) OR (HIIT[Title/Abstract]) |
| #6            | #4 or #5                                                                                                                                                                                                                                  |
| #7            | randomized controlled trial [MeSH Terms]                                                                                                                                                                                                  |
| #8            | ((((RCT[Title/Abstract]) OR (Randomized [Title/Abstract])) OR (Randomized Clinical [Title/Abstract])) OR (Controlled Clinical Trials [Title/Abstract])                                                                                    |
| #9            | #7 or #8                                                                                                                                                                                                                                  |
| #10           | #9 AND #6 AND #3                                                                                                                                                                                                                          |

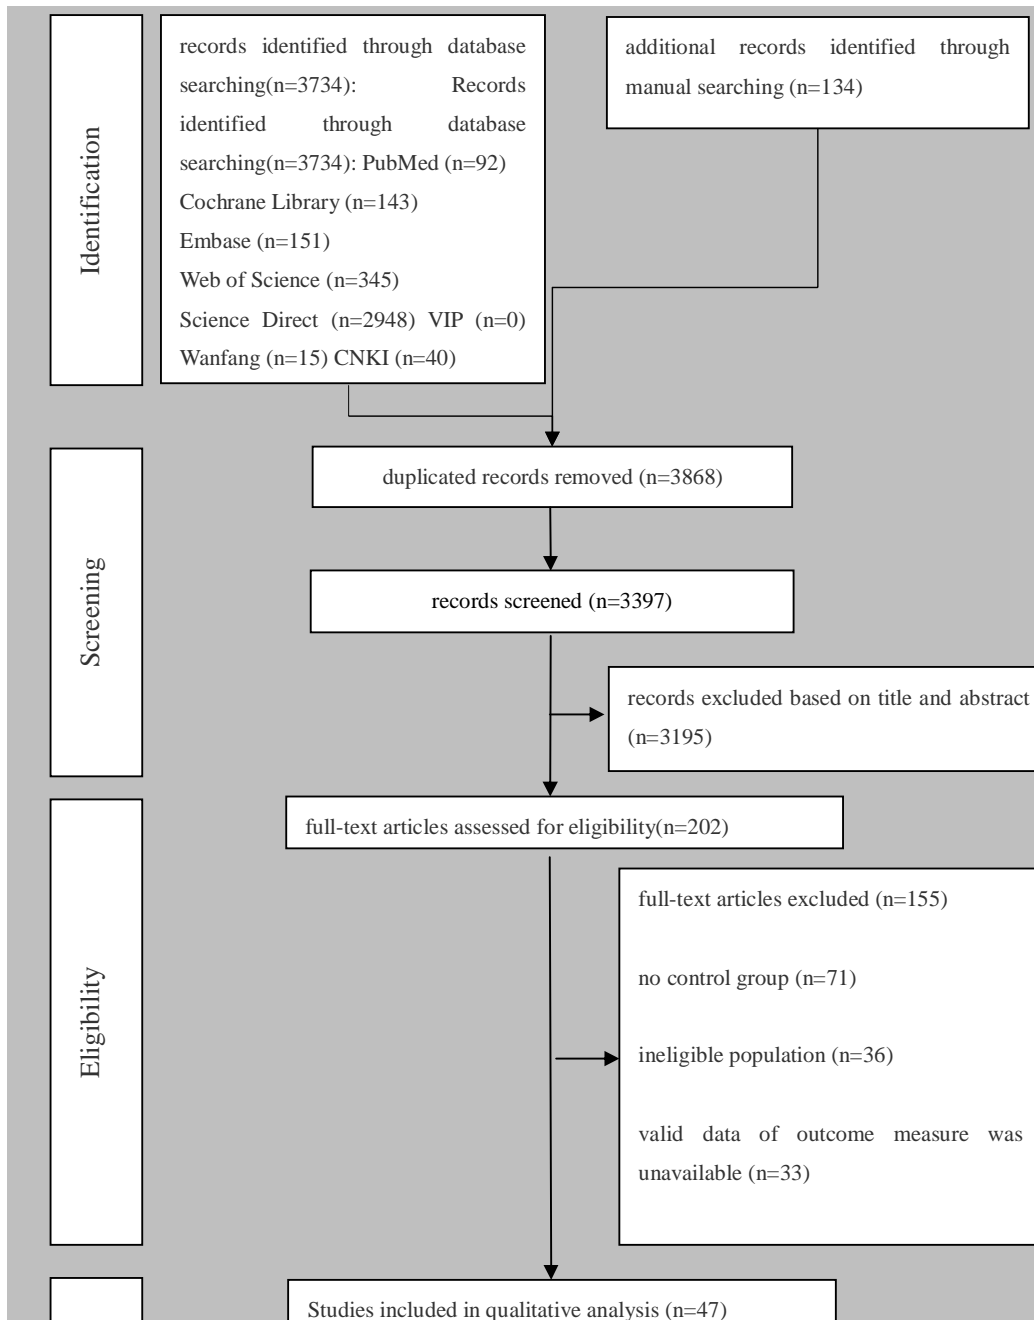



3  
4  
5  
6  
7

**Table 2** Basic features of the included studies

| Author             | Year | Country | Lesion  | Age                                     |                                         | sample                                          |                                                 | Intervention measure                                                                                                                                                               |                                                                                             | Intervention time  |               | outcome indicator       |
|--------------------|------|---------|---------|-----------------------------------------|-----------------------------------------|-------------------------------------------------|-------------------------------------------------|------------------------------------------------------------------------------------------------------------------------------------------------------------------------------------|---------------------------------------------------------------------------------------------|--------------------|---------------|-------------------------|
|                    |      |         |         | experimental group                      | control group                           | experimental group ( male/female )              | control group ( male/female )                   | experimental group                                                                                                                                                                 | control group                                                                               | experimental group | control group |                         |
| Valérie et al.[12] | 2022 | France  | Obesity | 13.0 ± 1.1                              | 13.2 ± 1.0                              | 19(11/8)                                        | 11(6/5)                                         | mode of motion: ergometer bicycle<br>exercise time:15mins<br>exercise frequency: twice/week<br>exercise intensity:75% to 90% VO <sub>2</sub> max                                   | not any physical training                                                                   | 16 weeks           | 16 weeks      | ①,②                     |
| Engel et al[22].   | 2019 | Germany | healthy | 11.6 ± 0.2                              | 11.7 ± 0.3                              | 17 ( 11/6 )                                     | 18(11/7)                                        | mode of motion: micro-session of Functional HIIT<br>exercise time:>6 mins<br>exercise frequency: week 1:3 times; week 2 to 4:4 times<br>exercise intensity: >85% HR <sub>max</sub> | mode of motion: regular school class                                                        | 4 weeks            | 4 weeks       | ①                       |
| Georges et al.[51] | 2010 | France  | healthy | 10.3± 9.8                               | 10.1 ±1.2                               | 22                                              | 19                                              | mode of motion: interval run<br>exercise time:18 to 39 minutes<br>exercise frequency:3 additional PE and 2 regular mandatory PE<br>exercise intensity:80 to 85% of MAS             | mode of motion: regular mandatory PE<br>exercise time:60 mins<br>exercise frequency: 2/week | 7 weeks            | 7 weeks       | ①,②, ⑦                  |
| MCNARRY et al.[15] | 2020 | England | asthma  | Asthma: 14.1±0.9<br>No-asthma: 14.1±0.8 | Asthma :14.2±1.0<br>No-asthma: 13.9±0.9 | Asthma group: 18 ( 10/8)<br>No-asthma:17 ( 9/8) | Asthma group: 18 ( 11/7)<br>No-asthma:16 ( 9/7) | mode of motion: games-based activities informed by formative work<br>exercise time:30 mins<br>exercise frequency:3/week<br>exercise intensity: >90%HR <sub>max</sub>               | exercise time:30 mins                                                                       | 6 mouths           | 6 mouths      | ①,③                     |
| Mazurek et al.[42] | 2014 | Poland  | females | 19.5±0.6                                |                                         | 24                                              | 42                                              | mode of motion: Mechanically-braked cycle ergometers<br>exercise time:47 mins<br>exercise frequency:3/week<br>exercise intensity:60% HR <sub>max</sub>                             | mode of motion: regular PE<br>exercise time:47 mins<br>exercise frequency: 1/week           | 8 weeks            | 8 weeks       | ①,③,④,⑤, ⑥,⑦,⑧          |
| Plavsic et al.[16] | 2020 | Serbia  | Obesity | 16.6 ± 1.3                              | 15.8 ± 1.5                              | 22                                              | 22                                              | mode of motion: Diet + HIIT (electronically braked cycle ergometer )<br>exercise time:43mins<br>exercise frequency:2/week                                                          | mode of motion: Diet                                                                        | 12 weeks           | 12 weeks      | ①,②,③,④, ⑤,⑥,⑦,⑧, ⑨,⑩,⑪ |

|                               |      |           |                   |                                                 |                                                |                                          |                                         |                                                                                                                                                                                   |                                                                         |           |           |                     |
|-------------------------------|------|-----------|-------------------|-------------------------------------------------|------------------------------------------------|------------------------------------------|-----------------------------------------|-----------------------------------------------------------------------------------------------------------------------------------------------------------------------------------|-------------------------------------------------------------------------|-----------|-----------|---------------------|
| Cvetković et al.[29]          | 2018 | Serbia    | obese males       |                                                 |                                                | 10                                       | 11                                      | exercise intensity:85 to 90% of HR <sub>max</sub><br>mode of motion: PE+HIIT ( interval runs )<br>exercise frequency:2/week                                                       | mode of motion: PE<br>exercise frequency: 2/week                        | 12weeks   | 12weeks   | ①,②,⑨,⑩,<br>☐       |
| Leahy et al.[23]              | 2019 | Australia | healthy           | 16.2±0.4                                        | 16.2±0.4                                       | 38                                       | 30                                      | mode of motion: included a combination of aerobic-based and resistance-based<br>exercise time:12–20 min<br>exercise frequency:3/week<br>exercise intensity:>85% HR <sub>max</sub> |                                                                         | 14 weeks  | 14 weeks  | ①,⑧                 |
| Costigan et al.[34]           | 2016 | UK        | healthy           | 15.7±0.7                                        | 15.6±0.6                                       | 21                                       | 22 ( 11/11 )                            | mode of motion: gross motor cardiorespiratory exercises<br>exercise time:8-10mins<br>exercise frequency:3/week                                                                    | mode of motion: PE<br>exercise frequency:3/week                         | 8 weeks   | 8 weeks   | ①                   |
| Rosenkranz et al.[48]         | 2012 | Manhattan | healthy           | 8.8±0.6                                         | 9.8±4.1                                        | 8                                        | 8                                       | mode of motion: performed on an indoor track<br>exercise time:30mins<br>exercise frequency: sessions spaced at least 48 h<br>exercise intensity:100–130% of MAS                   |                                                                         | 8 weeks   | 8 weeks   | ①,③,④,⑤,<br>⑥,⑦,⑨,⑩ |
| Hammami et al.[30]            | 2018 | Tunisia   | soccer players    | 15.9 ± 0.4                                      | 15.8 ± 0.7                                     | 10                                       | 10                                      | mode of motion: small-sided soccer drills<br>exercise time:35-45mins<br>exercise frequency:2/week<br>exercise intensity: ~ 85% HR <sub>max</sub>                                  | mode of motion: regular physical activity<br>exercise frequency: 2/week | 8 weeks   | 8 weeks   | ①,②                 |
| Winn et al.[13]               | 2021 | UK        | Asthma            | Asthma:<br>13.7 ± 1.0<br>No-asthma:<br>13.8±1.1 | Asthma:<br>13.4±1.2<br>No-asthma:<br>:13.5±1.0 | 221(116/105)                             | 69(21/48)                               | mode of motion: game-based activities<br>exercise frequency:3/week<br>exercise time:30mins<br>exercise intensity: >90% HR <sub>max</sub>                                          | mode of motion:<br>incremental ramp test                                | 6 mouths  | 6 mouths  | ①                   |
| Malte Nejst Larsen et al.[17] | 2020 | Denmark   | healthy           | 10±0.3                                          | 10±0.3                                         | 57                                       | 115                                     | exercise time:12 mins<br>exercise frequency:5/week                                                                                                                                | mode of motion: PE lessons                                              | 10 mouths | 10 mouths | ⑨,⑩                 |
| Soori et al.[18]              | 2020 | Iran      | hyperactivity     | 12.55 ± 0.15                                    | 12.5 ± 0.45                                    | 26 ( 9/17 )                              | 17 ( 11/6 )                             | mode of motion:20 meters running program<br>exercise time:>10 mins<br>exercise frequency:3/week<br>exercise intensity: 85% HR <sub>max</sub>                                      |                                                                         | 6 weeks   | 6 weeks   | ☐                   |
| Racil et al.[45]              | 2013 | Tunisian  | obese             | 15.6 ± 0.7                                      | 15.9 ± 1.2                                     | 11                                       | 12                                      | mode of motion: short bursts<br>exercise frequency:3/week<br>exercise intensity:100 to 110 % of MAS                                                                               | non-exercising                                                          | 12weeks   | 12 weeks  | ②,③,④,⑤,<br>⑥,⑦,⑧   |
| Lambrick et al.[35]           | 2016 | UK        | Healthy and obese | obesity:93±0.8<br>normal:92±0.7                 | obesity:94±0.8<br>normal:9.2±0.8               | normal:13 ( 8/5 )<br>obesity:15 ( 10/5 ) | normal:13 ( 7/6 )<br>obesity:14 ( 7/7 ) | mode of motion: equipment<br>exercise time:40 min<br>exercise frequency:2/week<br>exercise intensity: 40% difference between GET and VO <sub>2max</sub>                           | mode of motion: PE                                                      | 8 weeks   | 8 weeks   | ①,②,③,⑧,<br>☐       |

|                         |      |             |                                  |                                   |                                   |              |                |                                                                                                                                                    |                                                             |          |           |                   |      |
|-------------------------|------|-------------|----------------------------------|-----------------------------------|-----------------------------------|--------------|----------------|----------------------------------------------------------------------------------------------------------------------------------------------------|-------------------------------------------------------------|----------|-----------|-------------------|------|
| Baquet et al.[57]       | 2001 | France      | health                           | 12.8 ± 1.2                        | 13.5 ± 0.9                        | 503(263/240) | 48(21/27)      | mode of motion: PE+ running exercises.<br>exercise time:3 h<br>exercise frequency:3/week<br>exercise intensity:100 to 120% MAS                     | mode of motion: PE<br>exercise time:3 h<br>frequency:3/week | 10 weeks | 10 weeks  | ①,②               |      |
| Tjønnå et al.[54]       | 2009 | Norway      | Obese                            | 14.0 ±0.3 years                   |                                   | 13           | 14             | mode of motion: walking/running<br>exercise time: 40min<br>exercise frequency: 2/week<br>exercise intensity:90% HR <sub>max</sub>                  | mode of motion: exercise<br>exercise frequency: 2/month     | 3 mouths | 12 mouths | ①,②,③,④,⑤,⑥       |      |
| Zhu Kunru[19]           | 2020 | China       | Healthy girl                     | 16.35±0.490                       | 17.20±0.410                       | 20 ( 0/20 )  | 20 ( 0/20 )    | mode of motion: rope skipping<br>exercise time:15-20mins<br>exercise frequency:3/week                                                              | Regular training<br>15-20mins                               | 12 weeks | 12 weeks  | ①                 |      |
| Li kang[31]             | 2018 | China       | Healthy girl                     | 16.34±0.91                        | 16.63±0.90                        | 38 ( 0/38 )  | 54 ( 0/54 )    | mode of motion: sprints<br>exercise time:4-9mins ( Stepwise increase )<br>exercise frequency:2/week                                                | Regular PE                                                  | 8 weeks  | 8 weeks   | ①,⑧               |      |
| Mu Taiyang[24]          | 2019 | China       | Overweight and obese male judoka | 17.00±0.89                        | 17.18±0.98                        | 11 ( 11/0 )  | 11 ( 11/0 )    | mode of motion: Running and judo training<br>exercise time:45mins<br>exercise frequency:3/week<br>exercise intensity: > 85% HR <sub>max</sub>      | Regular training 45mins                                     | 12 weeks | 12 weeks  | ①,②,③             |      |
| Yang Zhongwu[25]        | 2019 | China       | teenagers                        | 11.50±0.513                       | 11.50±0.513                       | 20 ( 10/10 ) | 20 ( 10/10 )   | exercise time:45mins<br>exercise frequency:2/week<br>exercise intensity:85% to 90% HR <sub>max</sub>                                               | 60% to 70% HR <sub>max</sub>                                | 8 weeks  | 8 weeks   | ①,③               |      |
| Huo Kaiwen[20]          | 2020 | China       | teenagers                        | boy:12.70±0.48<br>girl:12.50±0.53 | boy:12.80±0.42<br>girl:12.90±0.32 | 20           | 20             | exercise time:50-60mins<br>exercise frequency:2/week<br>exercise intensity:90% to 95% HR <sub>max</sub>                                            | Regular training 50 to 60mins                               | 8 weeks  | 8 weeks   | ①,⑧               |      |
| Ma Qin[21]              | 2020 | China       | Obese male adolescents           | 13.53±0.72                        | 13.90±0.89                        | 15 ( 15/0 )  | 15 ( 15/0 )    | mode of motion: Combination of training<br>exercise time:40-50mins<br>exercise frequency:2/week<br>exercise intensity:85% HR <sub>max</sub>        | Regular PE                                                  | 8 weeks  | 8 weeks   | ①,②               |      |
| Dai Xiangdi[14]         | 2021 | China       | Healthy teenagers                | About 14                          | About 14                          | 49           | 47             | mode of motion: Combination of training<br>exercise time:20mins<br>exercise frequency:2/week<br>exercise intensity:65% to 85% HR <sub>max</sub>    | Regular PE                                                  | 8 weeks  | 8 weeks   | ①                 |      |
| Cao et al.[49]          | 2012 | China       | Obese adolescent boys            | 13-15                             | 13-15                             | 20 ( 20/0 )  | 20 ( 20/0 ) J2 | mode of motion: Combination of training<br>exercise time:50-60mins<br>exercise frequency:2/week<br>exercise intensity:90% to 95% HR <sub>max</sub> | Daily habits                                                | 8 weeks  | 8 weeks   | ①,②,⑧,⑨,⑩         |      |
| Martin Smith et al.[26] | 2019 | Scottish    | from 2 higher PE class           | 17±0.3                            | 16.8±0.5                          | 22(13/9)     | 30 ( 19/11 )   | mode of motion: running sprints<br>exercise time:25-26mins<br>exercise frequency:3/week<br>exercise intensity:92% of HR <sub>max</sub>             | mode of motion: PE<br>exercise time:1 h                     | 4 weeks  | 4weeks    | ①,③,④,⑤,⑥,⑦,⑧,⑨,⑩ |      |
| Ludyga et al.[27]       | 2019 | Switzerland | healthy male adolescents         | 14±0.8                            | 13.9±0.6                          | 32           | 28             | mode of motion: a circuit training<br>exercise time:20 mins                                                                                        |                                                             |          |           |                   | ①, ⑩ |

|                              |      |                          |                                    |                                         |                                         |                         |                         |                                                                                                                                                                                                                                        |                                                                                                                       |          |          |                  |
|------------------------------|------|--------------------------|------------------------------------|-----------------------------------------|-----------------------------------------|-------------------------|-------------------------|----------------------------------------------------------------------------------------------------------------------------------------------------------------------------------------------------------------------------------------|-----------------------------------------------------------------------------------------------------------------------|----------|----------|------------------|
| Ruiz-Ariza et al.[28]        | 2019 | Spain                    | healthy                            | 13.79 ± 1.38                            | 13.67 ± 1.29                            | 90(46/44)               | 94(52/42)               | mode of motion: Combination of training<br>exercise time:16mins<br>exercise frequency:2/week<br>exercise intensity: over 85% HR <sub>max</sub>                                                                                         | mode of motion: PE<br>exercise frequency: 2/week                                                                      | 12 weeks | 12 weeks | ①                |
| Racil et al. [36]            | 2016 | Tunis                    | obese adolescent females           | 14.2±1.2 years                          |                                         | 17                      | 14                      | mode of motion: Combined interval running<br>exercise time:>35mins<br>exercise frequency:3/week<br>exercise intensity:100% MAS                                                                                                         | mode of motion: non-exercising group                                                                                  | 12 weeks | 12 weeks | ②,③,⑨,⑩, Ⅱ       |
| Weston et al.[37]            | 2016 | United Kingdom           | Healthy and obese                  | 14.1 ± 0.3                              | 14.1 ± 0.3                              | 41 ( 33/8)              | 60(30/30)               | mode of motion: Many kinds of sports<br>exercise frequency:3/week<br>exercise intensity:90% HR <sub>max</sub>                                                                                                                          | mode of motion: PE<br>exercise frequency: 3/week                                                                      | 10 weeks | 10 weeks | ①,②,③,⑨, ⑩       |
| Racil et al.[38]             | 2016 | Tunisia                  | obese female adolescents           | 16.6 ± 0.9                              | 16.9 ± 1.0                              | 23                      | 19                      | mode of motion: plyometric exercises<br>exercise time: 26 to28mins<br>exercise frequency:3/week<br>exercise intensity:100%VO <sub>2 max</sub>                                                                                          | no exercise                                                                                                           | 12 weeks | 12 weeks | ②,③,⑧            |
| McNarry et al.[39]           | 2015 | UK                       | health and obesity                 | Obesity: 9.3 ± 0.9<br>normal: 9.2 ± 0.8 | Obesity: 9.3 ± 0.9<br>normal: 9.2 ± 0.8 | normal:13<br>obesity:15 | normal:16<br>obesity:11 | mode of motion: physical activity<br>exercise time:10 mins<br>exercise frequency:2/week                                                                                                                                                | usual care control group                                                                                              | 6 weeks  | 6 weeks  | ①,⑧, Ⅱ           |
| Martin et al.[40]            | 2015 | UK                       | healthy                            | 16.9 ± 0.3                              | 16.8 ± 0.6                              | 20(13 / 7)              | 23(18/5)                | mode of motion: Sprint combination training<br>exercise time:60 mins<br>exercise frequency:3/week                                                                                                                                      | mode of motion: PE<br>exercise frequency: 3/week                                                                      | 7 weeks  | 7 weeks  | ①                |
| Peter Riis Hansen et al.[46] | 2013 | Porto district, Portugal | Overweight children                | 8—12                                    | 8—12                                    | 20 ( 17/3 )             | 11 ( 7/4 )              | mode of motion: technical football exercises and small-sided football games<br>exercise time:1h-1.5h<br>exercise frequency:4/week<br>exercise intensity: > 80% HR <sub>max</sub>                                                       | mode of motion: compulsory sport curriculum at school<br>exercise frequency: 2/week<br>exercise time:45 to 90min/time | 3mouths  | 3mouths  | ①,⑨,⑩, Ⅱ         |
| Patrick Mucci et al.[47]     | 2013 | Tanner                   | prepubescent children              | 10.3±0.7                                | 9.8±0.6                                 | 9 ( 4/5 )               | 9 ( 6/3)                | mode of motion: running<br>exercise time:30mins<br>exercise frequency:2/week<br>exercise intensity:100%-130%                                                                                                                           | usual physical activities                                                                                             | 8 weeks  | 8 weeks  | ⑧                |
| Buchan et al.[50]            | 2012 | West of Scotland         | adolescent youth                   | 16.7±0.1                                | 16.3±0.5                                | 17 ( 15/2 )             | 24 ( 20/4 )             | mode of motion: repetitions of maximal sprint running<br>exercise time:54mins<br>exercise frequency:3/week<br>exercise intensity: maximal sprint running                                                                               | maintain normal activity patterns                                                                                     | 7weeks   | 7weeks   | ①,②,④,⑤, ⑥,⑦,⑨,⑩ |
| Breil et al.[52]             | 2010 | Bern, Switzerland        | Healthy elite junior alpine skiers | 17.4±1.1                                | 16.6±1.1                                | 13                      | 8                       | mode of motion: cycle ergometer; ski-speciWc obstacle running course containing slalom, balancing and jumping elements<br>exercise frequency: 15 times training<br>exercise time:16mins<br>exercise intensity:90–95% HR <sub>max</sub> | continued their normal endurance and strength training                                                                | 11days   | 11days   | ①,②,⑥,⑩          |

|                              |      |              |                                                           |             |             |             |            |                                                                                                                                                                                                                                                                                                            |                                                                                                |          |         |               |
|------------------------------|------|--------------|-----------------------------------------------------------|-------------|-------------|-------------|------------|------------------------------------------------------------------------------------------------------------------------------------------------------------------------------------------------------------------------------------------------------------------------------------------------------------|------------------------------------------------------------------------------------------------|----------|---------|---------------|
| Ferrete et al.[44]           | 2014 | Spain        | Healthy young soccer players                              | 9.32±0.25   | 8.26±0.33   | 11          | 13         | mode of motion: underwent soccer training ; 1/4 squat, deep jumps, CMJ with weight, and sprint exercises<br>exercise intensity: maximal voluntary intensity using player's body weight (or body weight plus light resistances) as external resistance<br>exercise time:30mins<br>exercise frequency:3/week | mode of motion: underwent soccer training<br>exercise time:30mins<br>exercise frequency:3/week | 26weeks  | 26weeks | ②             |
| Lau et al.[41]               | 2015 | Hong Kong    | overweight children                                       | 11.0 ± 0.6  | 10.6 ± 0.6  | 15          | 12         | mode of motion: intermittent running ; attended normal PE<br>exercise time:72mins<br>exercise frequency:3/week<br>exercise intensity:120% of MAS                                                                                                                                                           | mode of motion: attended normal PE<br>exercise time:35mins<br>exercise frequency:2/week        | 6weeks   | 6weeks  | ①, ⑩          |
| Boer et al.[43]              | 2014 | Belgian      | adolescents and young adults with intellectual disability | 18±3.2      | 17.4±2.4    | 17 ( 11/6 ) | 14 ( 9/5 ) | mode of motion: cycling<br>exercise time:40mins<br>exercise frequency:2/week<br>exercise intensity: >100%VTR                                                                                                                                                                                               | participated in usual everyday scholar activities without supervised exercise training         | 15 weeks | 15weeks | ①,②,③,④,⑤,⑥,⑩ |
| A. M. McManus et al.[55]     | 2005 | Hong Kong    | boys                                                      | 10.35±0.32  | 10.51 ± 0.3 | 10          | 15         | mode of motion: Loop pedalling<br>exercise time:20mins<br>exercise frequency:3time/week                                                                                                                                                                                                                    | normal physical activity                                                                       | 8weeks   | 8weeks  | ⑥,⑩           |
| Helgerud et al.[58]          | 2001 | America      | male                                                      | 18.1±0.8    | 18.1±0.8    | 9           | 10         | mode of motion: run + game<br>exercise frequency:2/week<br>exercise intensity: 90 to 95% of HR <sub>max</sub>                                                                                                                                                                                              | Regular exercise                                                                               | 8weeks   | 8weeks  | ⑧             |
| G. Baquet et al.[56]         | 2002 | France       | pubescent children                                        | 9.7±0.9     | 10.1±0.4    | 20(10/10)   | 33(13/20)  | mode of motion: high intensity intermittent running exercises<br>exercise time:30mins<br>exercise frequency:2/week<br>exercise intensity:100 to130% of MAS                                                                                                                                                 | Normal PE                                                                                      | 7weeks   | 7weeks  | ②,⑧,⑩         |
| Anneke van Biljon et al.[32] | 2018 | The Republic | children                                                  | 11.1 ± 0.8  | 11.1 ± 0.8  | 29          | 24         | mode of motion: Sprint cycle<br>exercise time:23mins<br>exercise frequency:3/week<br>exercise intensity: > 80% HR <sub>max</sub>                                                                                                                                                                           | Normal PE                                                                                      | 5weeks   | 5weeks  | ①,②,③,④,⑤,⑩   |
| Juliana Pizzi et al.[33]     | 2017 | America      | Obese Adolescences                                        | 12.18 ± 1.5 | 14.29 ± 1.8 | 20          | 34         | mode of motion: running<br>exercise time:45mins<br>exercise frequency:3/two days                                                                                                                                                                                                                           |                                                                                                | 12weeks  | 12weeks | ①,③,④,⑤,⑥, ⑦  |
| Lynne Mary Boddy et al.[53]  | 2010 | UK           | Obese                                                     | 11.78 ± 0.2 | 11.87 ± 0.3 | 8           | 8          | mode of motion: high intensity exercise program loosely based on dance<br>exercise time:20mins<br>exercise frequency:4/week                                                                                                                                                                                | Normal life                                                                                    | 3weeks   | 3weeks  | ①,②,③,④,⑤,⑥,⑩ |

8 Notes: ①BMI,②BF%,③WC,④TC,⑤TG,⑥HDL-C,⑦LDL-C,⑧VO<sub>2</sub>,⑨SBP,⑩DBP, ⑪HR<sub>max</sub>

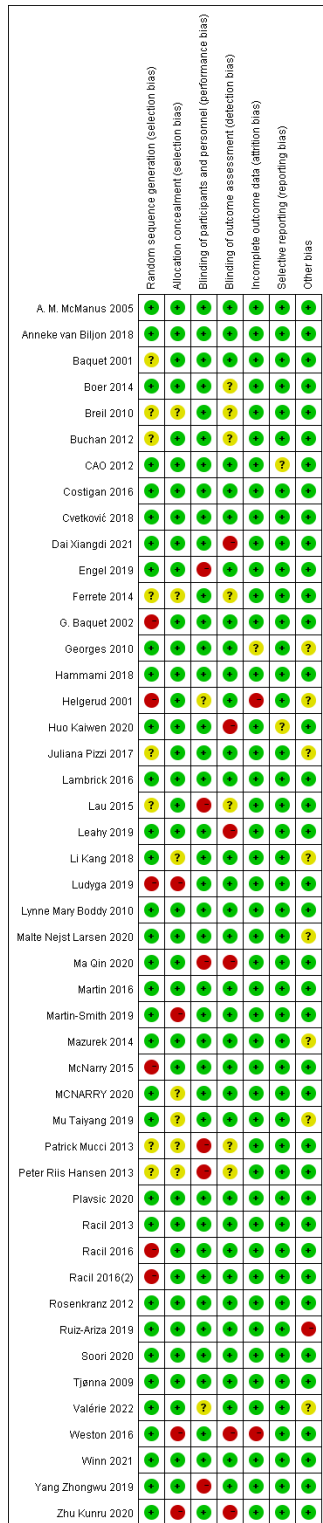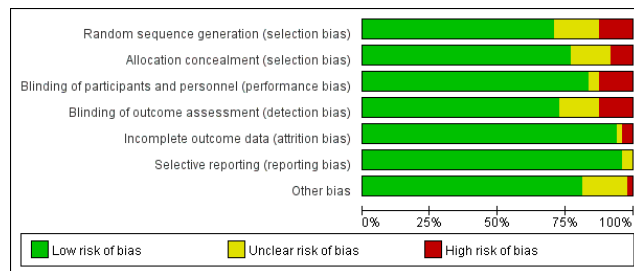

**Fig. 2** Analysis of the risk of bias according to the Cochrane Collaboration Guideline

**Table 2** Three-line table of Egger's Publishing Bias

| <b>Outcomes</b>    | <b>Number of studies</b> | <b>Root MSE</b> | <b>Std. Eff.</b> | <b>Coef.</b> | <b>Std. Err.</b> | <b>t</b> | <b>p&gt; t </b> | <b>[95% Conf. Interval]</b> |           |
|--------------------|--------------------------|-----------------|------------------|--------------|------------------|----------|-----------------|-----------------------------|-----------|
| BMI                | 36                       | 1.524           | slope            | .2195473     | .2006643         | 1.09     | 0.282           | -.1882517                   | .6273462  |
|                    |                          |                 | bias             | -1.013953    | .7345551         | -1.38    | 0.176           | -2.506749                   | .4788423  |
| BF%                | 20                       | 1.605           | slope            | -.6003318    | .3335849         | 1.80     | 0.089           | -.100504                    | 1.301168  |
|                    |                          |                 | bias             | -2.485502    | 1.056721         | -2.35    | 0.030           | -4.70559                    | -.2654136 |
| WC                 | 16                       | 1.673           | slope            | .7849622     | .5614075         | 1.40     | 0.184           | -.4191371                   | 1.9890611 |
|                    |                          |                 | bias             | -3.023636    | 1.763666         | -1.71    | 0.108           | -6.806323                   | .7590503  |
| VO <sub>2max</sub> | 19                       | 1.644           | slope            | -.3187151    | .4612036         | -0.69    | 0.499           | -1.29177                    | .6543394  |
|                    |                          |                 | bias             | 2.870097     | 1.416205         | 2.03     | 0.059           | -.1178346                   | 5.858029  |
| SBP                | 14                       | 1.446           | slope            | .078006      | .3490282         | 0.22     | 0.827           | -.6824612                   | .8384732  |
|                    |                          |                 | bias             | -1.319617    | 1.166486         | -1.13    | 0.280           | -3.861171                   | 1.221937  |
| DBP                | 14                       | 1.8             | slope            | .0417849     | .4332558         | 0.10     | 0.925           | -.9021983                   | .9857682  |
|                    |                          |                 | bias             | -.3722117    | 1.448374         | -0.26    | 0.802           | -3.527947                   | 2.783524  |
| HR <sub>max</sub>  | 13                       | 2.569           | slope            | -1.718386    | 1.203516         | -1.43    | 0.181           | -4.367307                   | .9305347  |
|                    |                          |                 | bias             | 5.734588     | 3.564588         | 1.61     | 0.136           | -2.111017                   | 13.58019  |

**Table 3** Three-line table of subgroup analysis

| Outcomes           | Subgroup              |               | The Number<br>of studies | Pooled estimate [SMD/MD<br>(95 % CI)] | p value | I <sup>2</sup> (%) | Test for subgroup<br>differences |
|--------------------|-----------------------|---------------|--------------------------|---------------------------------------|---------|--------------------|----------------------------------|
| BF(%)              | Participants          | Health        | 4                        | 1.23(-0.96,3.42)                      | p=0.270 | 42.0%              | p=0.020                          |
|                    |                       | Obesity       | 11                       | -1.59(-2.59, -0.58)                   | p=0.002 | 77.0%              |                                  |
|                    |                       | Else          | 5                        | 0.12(-1.11,1.35)                      | p=0.850 | 0.0%               |                                  |
| WC(cm)             | Participants          | Health        | 2                        | 0.57(-3.54,4.67)                      | p=0.790 | 0.0%               | p=0.350                          |
|                    |                       | Obesity       | 8                        | -2.06(-3.26, -0.86)                   | p<0.001 | 0.0%               |                                  |
|                    |                       | Else          | 6                        | -0.36(-3.82,3.09)                     | p=0.840 | 83.0%              |                                  |
| VO <sub>2max</sub> | Age                   | 5< <15        | 10                       | 3.99(2.76,5.22)                       | p<0.001 | 44.0%              | p=0.130                          |
|                    |                       | ≥15           | 9                        | 1.76(0.75,2.76)                       | p=0.090 | 91.0%              |                                  |
|                    | Participants          | Health        | 5                        | 3.49(1.57,5.41)                       | p<0.001 | 42.0%              | p<0.001                          |
|                    |                       | Obesity       | 6                        | 2.12(0.05,4.18)                       | p=0.040 | 92.0%              |                                  |
|                    |                       | Else          | 8                        | 3.31(1.93,4.69)                       | p<0.001 | 0.0%               |                                  |
|                    | Intervention<br>Time  | ≤10 weeks     | 14                       | 3.59(2.38,4.81)                       | p<0.001 | 44.0%              | p=0.130                          |
|                    |                       | >10 weeks     | 5                        | 1.77(-0.26,3.79)                      | p=0.090 | 91.0%              |                                  |
|                    | Exercise<br>Frequency | <3 times/week | 9                        | 3.09(1.80,4.38)                       | p<0.001 | 65.0%              | p=0.750                          |
|                    |                       | ≥3 times/week | 10                       | 2.76(1.21,4.31)                       | p<0.001 | 67.0%              |                                  |
| SBP                | Age                   | 5< <15        | 10                       | -2.00(-4.22,0.21)                     | p=0.008 | 69.0%              | p=0.100                          |
|                    |                       | ≥15           | 4                        | -4.99(-7.83, -2.15)                   | p<0.001 | 0.0%               |                                  |
|                    | Participants          | Health        | 3                        | -2.84(-5.16, -0.52)                   | p=0.020 | 23.0%              | p=0.910                          |
|                    |                       | Obesity       | 7                        | -3.20(-6.47,0.07)                     | p=0.006 | 73.0%              |                                  |
|                    |                       | Else          | 4                        | -1.89(-6.70, 2.92)                    | p=0.440 | 69.0%              |                                  |
|                    | Intervention<br>Time  | ≤10 weeks     | 7                        | -2.11(-5.01,0.79)                     | p=0.150 | 60.0%              | p=0.530                          |
| >10 weeks          |                       | 7             | -3.43(-6.30,0.56)        | p=0.020                               | 72.0%   |                    |                                  |



|                    |                    |               |                    |                      |         |         |         |
|--------------------|--------------------|---------------|--------------------|----------------------|---------|---------|---------|
| DBP                | Exercise Frequency | <3 times/week | 5                  | -3.48(-7.42,0.46)    | p=0.080 | 75.0%   | p=0.067 |
|                    |                    | ≥3 times/week | 9                  | -2.48(-4.78, -0.19)  | p=0.030 | 55.0%   |         |
|                    | Age                | 5 < <15       | 10                 | -1.59(-3.93,0.74)    | p=0.180 | 74.0%   | p=0.070 |
|                    |                    | ≥15           | 4                  | -4.99(-7.83, -2.15)  | p<0.001 | 0.0%    |         |
|                    | Participants       | Health        | 3                  | -2.84(-5.16,0.52)    | p=0.020 | 23.0%   | p=0.940 |
|                    |                    | Obesity       | 7                  | -2.52(-5.92,0.89)    | p=0.150 | 79.0%   |         |
|                    |                    | Else          | 4                  | -1.89(-6.70,2.92)    | p=0.440 | 69.0%   |         |
|                    | Intervention Time  | ≤10 weeks     | 7                  | -1.44(-4.77,1.90)    | p=0.400 | 73.0%   | p=0.37  |
| >10 weeks          |                    | 7             | -3.43(-6.3, -0.56) | p=0.020              | 72.0%   |         |         |
| HR <sub>max</sub>  | Exercise Frequency | <3 times/week | 5                  | -3.48(-7.42,0.46)    | p=0.080 | 75.0%   | p=0.54  |
|                    |                    | ≥3 times/week | 9                  | -2.00(-4.63,0.44)    | p=0.140 | 69.0%   |         |
|                    | Age                | 5 < <15       | 10                 | 7.27(2.12,12.41)     | p=0.006 | 97.0%   | p=0.008 |
|                    |                    | ≥15           | 2                  | -2.82(-8.21,2.57)    | p=0.300 | 0.0%    |         |
|                    | Participants       | Health        | 2                  | 45.39(-39.87,130.65) | p=0.300 | 100.0%  | p=0.570 |
|                    |                    | Obesity       | 4                  | -0.01(-2.47,2.46)    | p=1.000 | 41.0%   |         |
|                    |                    | Else          | 6                  | 0.22(-1.50,1.06)     | p=0.740 | 13.0%   |         |
|                    | Intervention Time  | ≤10 weeks     | 8                  | 0.09(-1.16,1.34)     | p=0.890 | 14.0%   | p=0.650 |
| >10 weeks          |                    | 3             | -0.48(-2.67,1.70)  | p=0.660              | 35.0%   |         |         |
| Exercise Frequency | <3 times/week      | 5             | -1.85(-3.86,0.16)  | p=0.070              | 0.0%    | p=0.030 |         |
|                    | ≥3 times/week      | 6             | 0.45(-0.02,0.92)   | p=0.060              | 3.0%    |         |         |

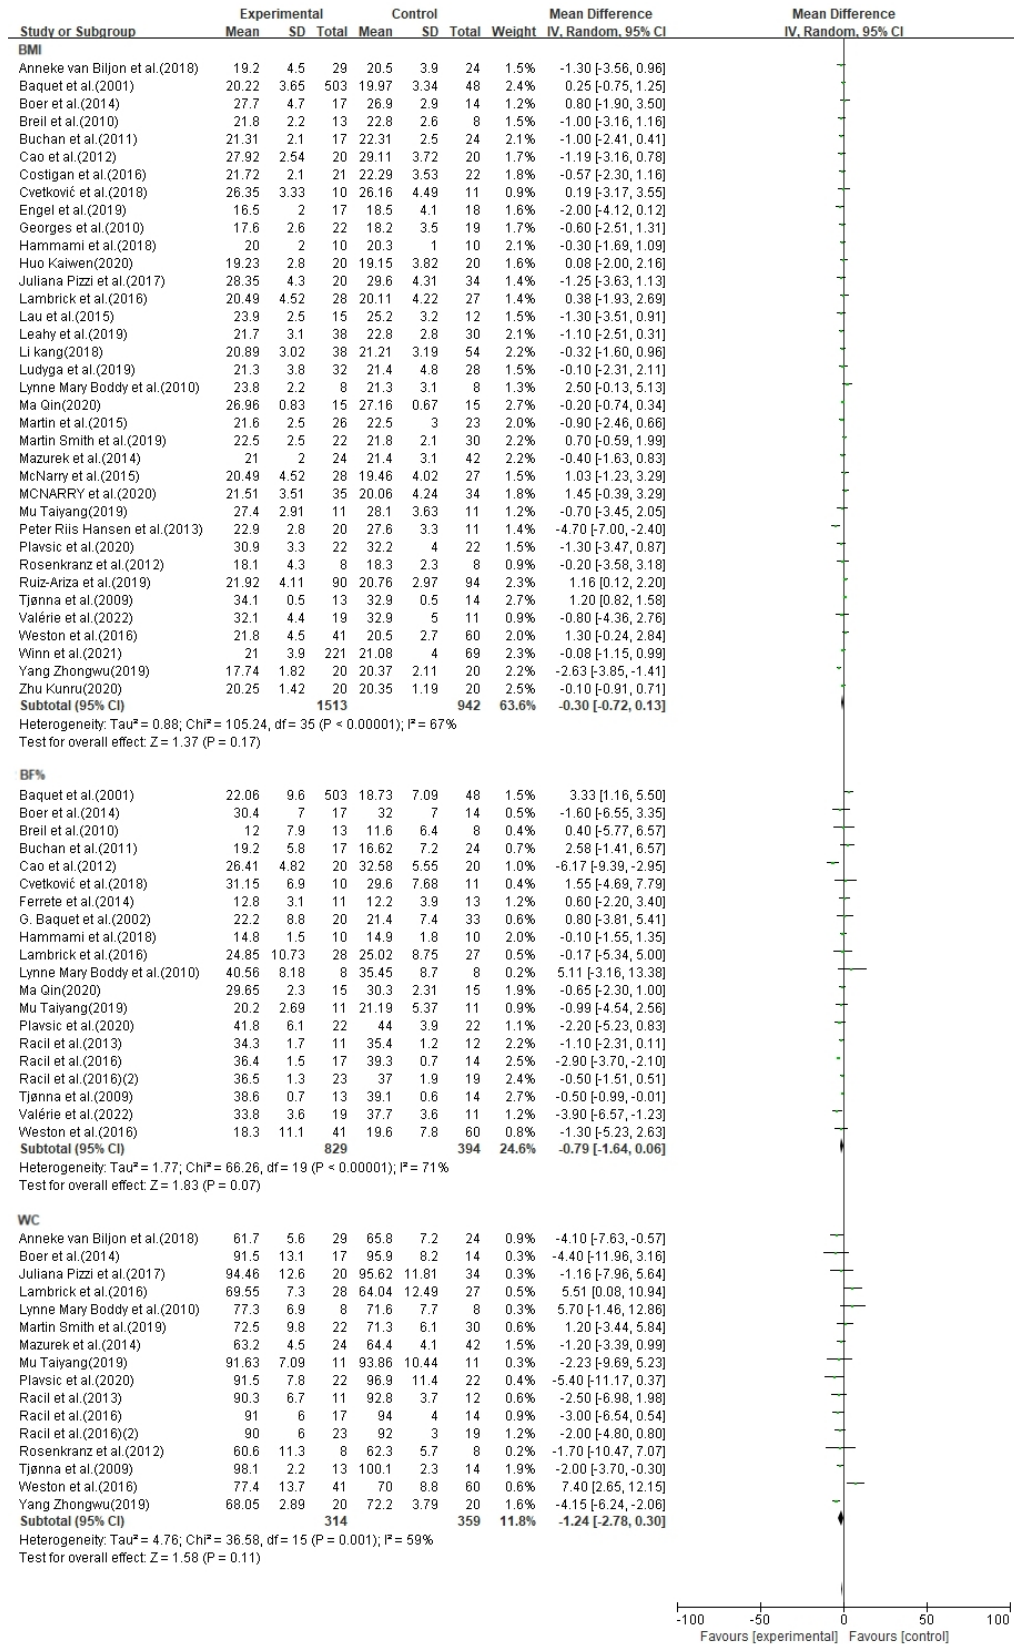

**Fig. 3** Forest plot of body morphology indicators

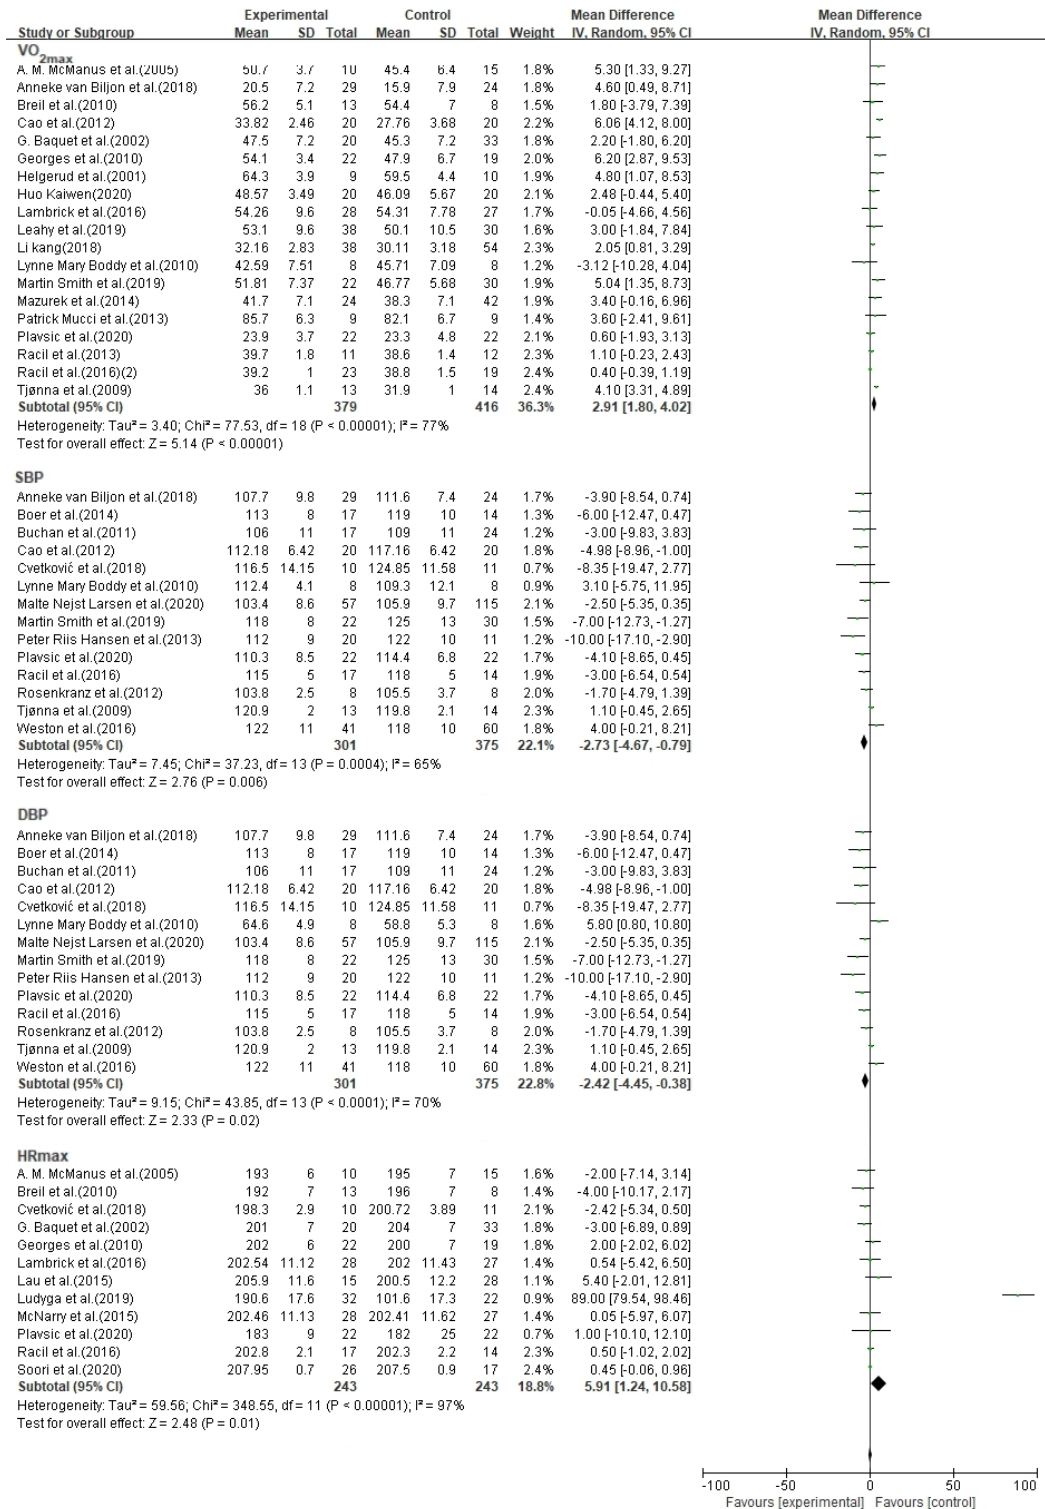

Fig. 4 Forest plot of CRF indicators

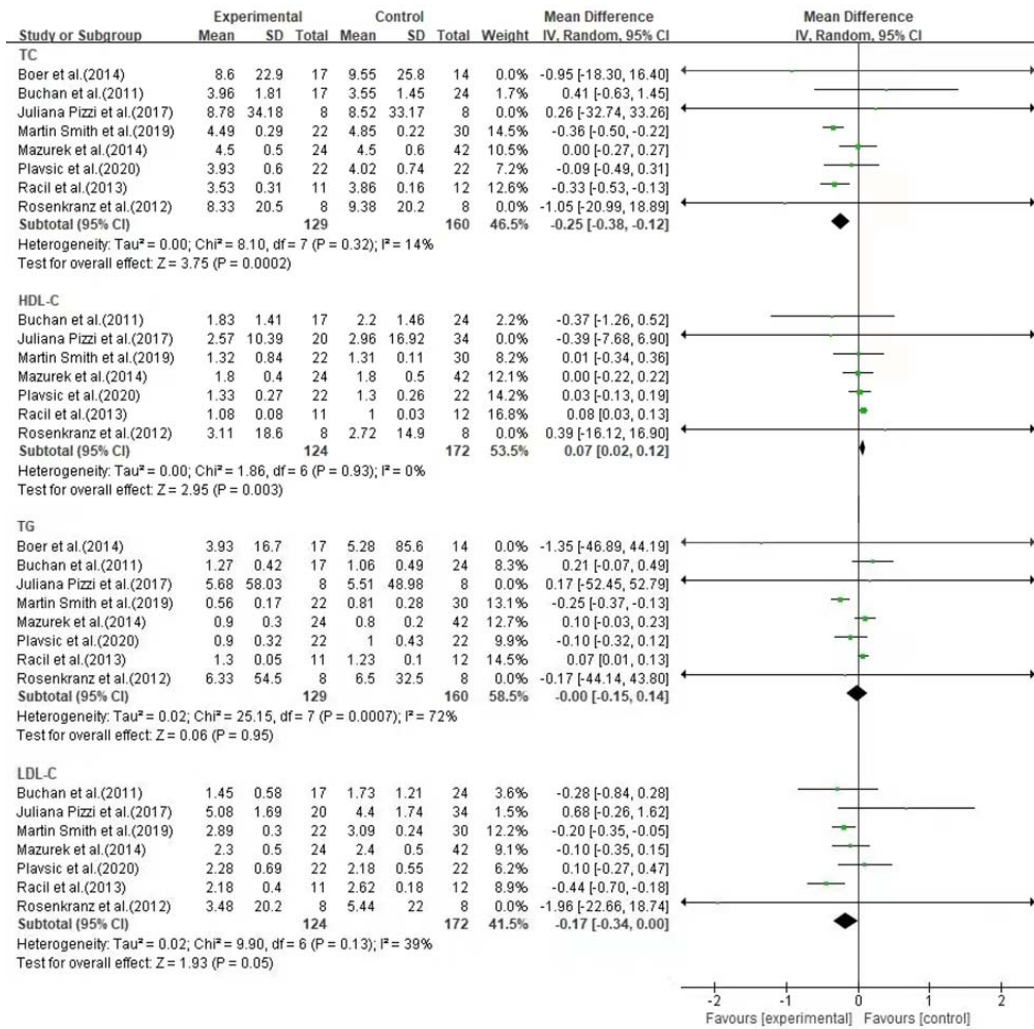

**Fig. 5** Forest plot of cardiovascular metabolic indicators

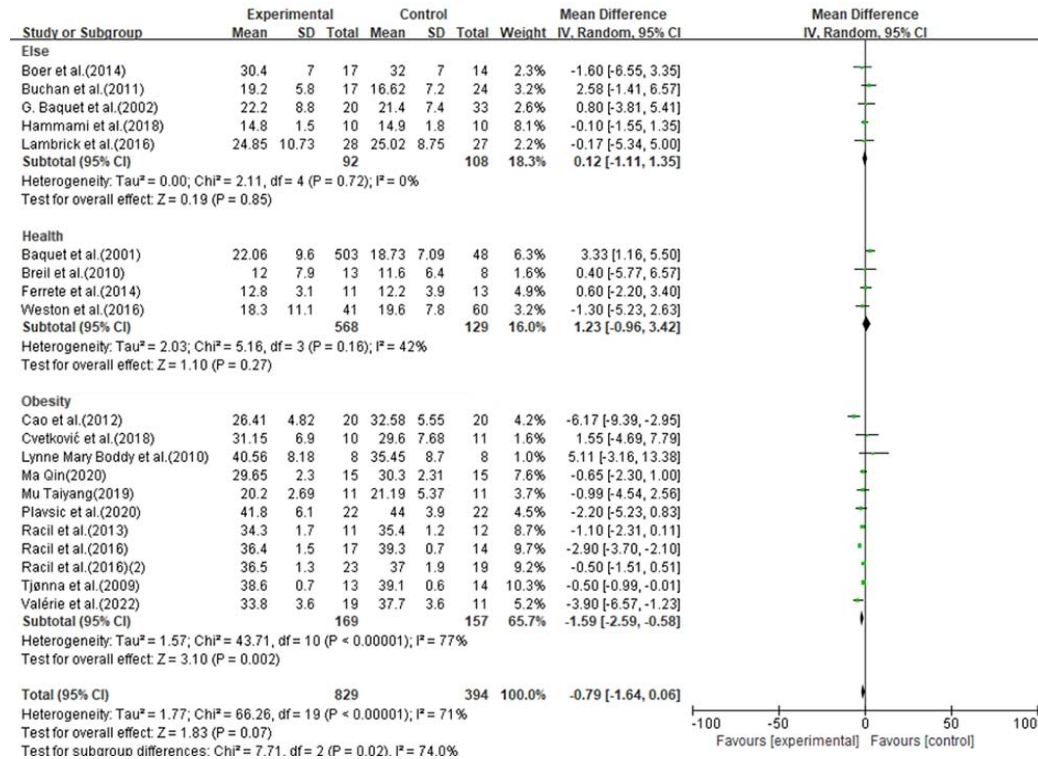

**Fig. 6** Participants subgroup analysis of BF% max in children and adolescents in the HIIT group and the control group

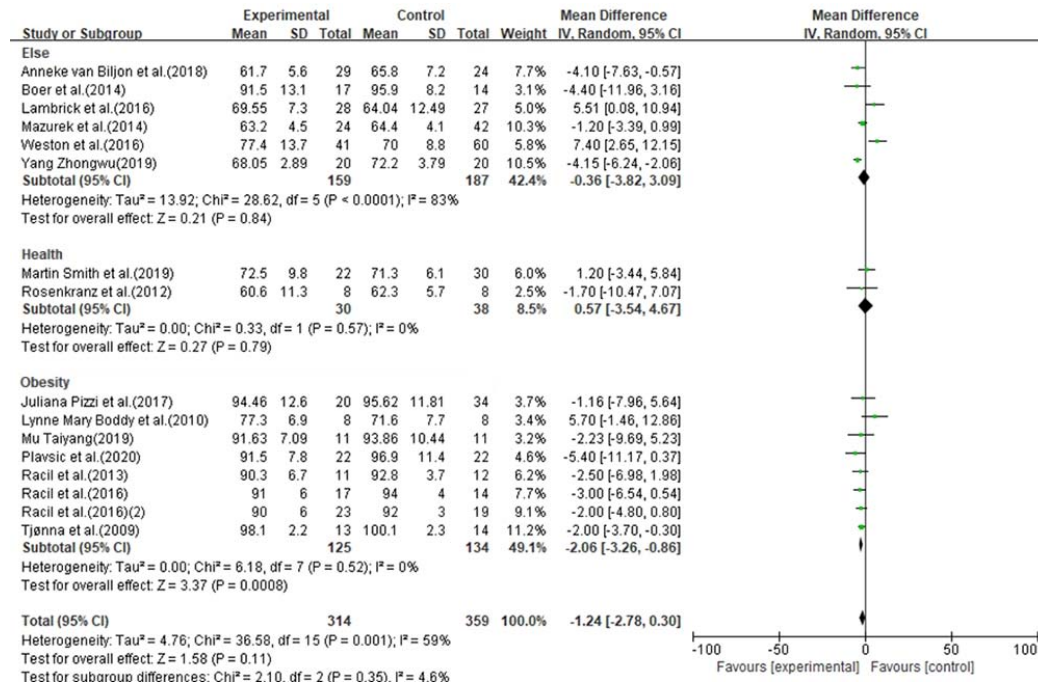

**Fig. 7** Participants subgroup analysis of WC max in children and adolescents in the HIIT group and the control group
